# Supplementary material
Source: publisher figshare collection journal article supplement (https://gsajournals.figshare.com/ndownloader/files/24099524)
Supplement: Supplementary file 1 [file 24099524]

## Sheet: WT(V)
	WT(V)		MALE
WORM	A	B	C	D	E		#CO	domain	L	LC	RC	R
1	H	H	H	H	H		0
2	B	B	B	B	B		0
3	B	B	B	B	B		0
4	H	H	H	H	H		0
5	H	H	H	B	B		1	RC			1
6	B	B	B	B	B		0
7	H	H	H	H	H		0
8	H	H	H	H	B		1	R				1
9	H	H	H	H	B		1	R				1
10	H	H	H	H	H		0
11	B	B	B	B	B		0
12	H	H	H	H	H		0
13	H	H	H	H	H		0
14	B	H	H	H	H		1	L	1
15	B	B	B	B	H		1	R				1
16	B	B	B	B	B		0
17	H	H	H	H	H		0
18	H	H	H	H	H		0
19	H	H	H	H	H		0
20	H	H	H	B	B		1	RC			1
21	H	B	B	B	B		1	L	1
22	H	H	H	H	H		0
23	B	B	B	H	H		1	RC			1
24	B	B	B	B	B		0
25	B	B	B	H	H		1	RC			1
26	B	B	B	B	B		0
27	H	H	H	H	B		1	R				1
28	B	B	B	B	B		0
29	H	H	H	H	H		0
30	B	B	B	B	B		0
31	B	B	B	B	B		0
32	H	H	H	H	B		1	R				1
33	H	B	B	B	H		2	L, R	1			1
34	H	H	H	H	H		0
35	H	H	H	H	H		0
36	B	B	B	B	B		0
37	B	B	B	B	B		0
38	B	B	B	H	H		1	RC			1
39	H	H	B	B	B		1	LC		1
40	H	H	H	H	H		0
41	B	B	B	H	H		1	RC			1
42	B	B	B	B	B		0
43	B	B	B	B	B		0
44	B	B	B	B	B		0
45	H	H	H	H	H		0
46	H	B	B	B	B		1	L	1
47	H	H	H	H	B		1	R				1
48	H	H	H	H	B		1	R				1
49	B	B	B	B	B
50	B	H	H	H	H		1	L	1
51	H	H	H	H	H
52	B	B	B	B	B
53	B	B	B	B	B
54	B	B	B	B	B
55	H	H	H	H	H
56	B	B	B	B	B
57	B	H	H	H	H		1	L	1
58	B	B	B	H	H		1	RC			1
59	B	B	B	B	B
60	B	B	B	B	B
61	B	B	B	B	B
62	H	H	H	H	H
63	B	B	B	B	H		1	R				1
64	H	H	H	H	B		1	R				1
65	B	B	B	B	B
66	B	B	B	B	H		1	R				1
67	B	B	B	H	H		1	RC			1
68	B	B	B	B	B
69	B	B	B	B	B
70	H	H	H	B	H		2	RC, R			1	1
71	H	H	H	H	H
72	B	B	B	B	B
73	H	H	H	H	B		1	R				1
74	B	H	H	H	H		1	L	1
75	H	B	B	B	B		1	L	1
76	H	B	B	B	B		1	L	1
77	H	H	H	B	B		1	RC			1
78	B	B	B	B	B
79	H	B	B	B	B		1	L	1
80	B	H	H	H	H		1	L	1
81	B	B	B	B	B
82	B	B	B	B	B
83	B	B	B	B	B
84	H	H	H	H	H
85	H	B	B	B	B		1	L	1
86	B	B	B	B	H		1	R				1
87	H	B	B	B	B		1	L	1
88	H	H	H	H	H
89	B	B	B	B	H		1	R				1
90	B	B	B	B	B
91	H	H	H	H	H
92	H	H	H	H	B		1	R				1
93	B	B	B	B	H		1	R				1
94	H	B	B	B	B		1	L	1
95	B	B	B	B	B
96	H	B	B	B	H		2	L, R	1			1
97	H	H	H	B	B		1	RC			1
98	H	B	B	B	B		1	L	1
99	B	B	B	B	H		1	R				1
100	B	B	B	B	B
101	B	B	B	B	B
102	B	B	B	B	B
103	B	H	H	H	H		1	L	1
104	B	H	H	H	H		1	L	1
105	H	H	H	H	H
106	H	H	H	H	H
107	H	H	H	H	H
108	H	H	H	H	H
109	B	H	H	H	H		1	L	1
110	H	H	B	B	B		1	LC		1
111	H	H	H	H	H
112	B	B	B	B	B
113	B	B	B	B	H		1	R				1
114	H	H	H	H	B		1	R				1
115	H	B	B	B	B		1	L	1
116	B	B	B	B	B
117	H	B	B	B	B		1	L	1
118	B	B	B	B	B
119	B	H	H	H	H		1	L	1
120	B	B	B	B	H		1	R				1
121	H	H	H	H	H
122	B	B	B	B	B
123	B	B	B	B	B
124	B	H	H	H	H		1	L	1
125	B	B	B	B	B
126	H	H	H	H	B		1	R				1
127	H	H	H	H	H
128	H	H	H	H	H
129	B	B	B	B	B
130	H	B	B	B	B		1	L	1
131	B	B	B	B	H		1	R				1
132	H	H	H	H	B		1	R				1
133	B	B	B	B	B
134	B	B	B	B	B
135	B	B	B	B	H		1	R				1
136	H	H	H	H	H
137	H	H	H	H	H
138	B	B	B	B	B
139	H	H	H	H	H
140	B	B	B	B	B
141	B	B	B	B	B
142	B	B	B	B	B
143	H	B	B	B	B		1	L	1
144	B	B	B	B	B
145	H	H	H	H	B		1	R				1
146	B	B	B	B	B
147	B	B	B	B	B
148	B	H	H	H	H		1	L	1
149	H	B	B	B	B		1	L	1
150	B	B	B	B	B
151	B	B	B	B	B
152	B	B	B	B	B
153	B	B	B	B	B
154	B	B	B	B	B
155	B	H	H	H	H		1	L	1
156	H	H	H	H	H
157	B	B	B	B	B
158	B	H	H	H	H		1	L	1
159	B	B	B	B	H		1	R				1
160	H	H	H	H	B		1	R				1
161	B	B	B	B	B
162	B	B	B	B	B
163	B	B	B	B	H		1	R				1
164	H	H	H	H	B		1	R				1
165	B	B	B	B	B
166	B	B	B	B	B
167	H	H	H	H	H
168	H	B	B	B	B		1	L	1
169	H	B	B	B	B		1	L	1
170	B	B	B	B	B
171	B	B	B	B	B
172	B	H	H	H	H		1	L	1
173	H	B	B	B	B		1	L	1
174	B	B	B	H	H		1	RC			1
175	B	B	B	B	B
176	H	H	H	H	H
177	H	B	B	B	B		1	L	1
178	H	H	H	H	H
179	H	H	H	H	B		1	R				1
180	H	H	B	B	B		1	LC		1
181	B	B	B	B	H		1	R				1
182	B	B	B	H	H		1	RC			1
183	H	H	H	H	H
184	B	B	B	B	B
185	B	B	B	B	B
186	H	B	B	B	B		1	L	1
187	H	H	H	H	H
188	B	B	B	H	H		1	RC			1
n =							188								WT(V)		L	LC	RC	R	sum
total CO							85		35	3	14	33	85			% for domain	41.1765	3.52941	16.4706	38.8235	100
total DCO							3									cM for domain	18.617	1.59574	7.44681	17.5532	45.2128
total SCO							79
total NCO							106
cM							45.2128
							SCO	L=	33
								LC=	3
								RC=	13
								R=	30

## Sheet: WT (I)
	WT(I)		MALE
WORM	A	B	C	D	E		#CO	domain	L	LC	RC	R
1	H	H	H	H	H		0
2	H	H	H	H	H		0
3	H	H	H	H	H		0
4	B	B	B	B	B		0
5	B	B	B	B	B		0
6	H	H	H	H	H		0
7	H	H	B	B	B		1	LC		1
8	H	B	H	H	H		2	L, LC	1	1
9	B	H	H	H	H		1	L	1
10	H	H	H	H	B		1	R				1
11	B	B	B	B	B		0
12	H	H	H	H	H		0
13	H	H	H	H	H		0
14	H	H	H	H	H		0
15	B	B	H	H	H		1	LC		1
16	B	B	B	B	B		0
17	B	B	B	B	B		0
18	B	B	B	B	B		0
19	H	H	H	H	H		0
20	B	B	B	B	B		0
21	B	B	B	B	B		0
22	H	H	H	H	H		0
23	H	H	H	H	H		0
24	H	H	H	H	H		0
25	B	B	B	B	B		0
26	H	H	H	H	H		0
27	B	B	B	B	B		0
28	B	B	B	B	B		0
29	B	H	H	H	H		1	L	1
30	B	B	B	B	H		1	R				1
31	H	H	H	H	H		0
32	H	H	H	H	H		0
33	H	H	H	H	H		0
34	B	B	B	H	H		1	RC			1
35	H	H	B	B	B		1	LC		1
36	B	B	B	B	B		0
37	B	B	B	B	H		1	R				1
38	H	H	H	H	H		0
39	B	B	B	H	H		1	RC			1
40	H	H	H	H	B		1	R				1
41	B	B	B	B	B		0
42	H	H	H	H	B		1	R				1
43	B	B	B	B	B		0
44	H	H	B	B	B		1	LC		1
45	B	B	B	B	B		0
46	H	H	H	H	B		1	R				1
47	B	B	B	B	B		0
48	B	B	B	B	B		0
49	B	B	B	B	B
50	B	B	B	B	B
51	B	B	H	H	H		1	LC		1
52	B	H	H	H	H		1	L	1
53	B	B	B	B	B
54	H	H	H	H	H
55	B	H	H	H	H		1	L	1
56	H	H	H	H	H
57	B	B	B	B	B
58	H	H	H	H	B		1	R				1
59	B	H	B	B	B		2	L, LC	1	1
60	H	H	H	H	H
61	H	B	B	B	B		1	L	1
62	H	H	H	B	B		1	RC			1
63	B	B	B	B	B
64	B	H	H	H	H		1	L	1
65	H	H	H	H	H
66	H	H	H	H	B		1	R				1
67	H	H	H	H	B		1	R				1
68	B	B	B	B	B
69	B	B	B	B	B
70	H	H	H	H	H
71	B	B	B	B	B
72	H	H	B	B	B		1	LC		1
73	H	H	H	H	H
74	H	H	H	H	H
75	B	B	H	H	H		1	LC		1
76	H	B	B	B	B		1	L	1
77	B	B	B	B	B
78	B	B	B	B	H		1	R				1
79	B	B	B	B	B
80	H	H	H	H	H
81	B	B	B	B	H		1	R				1
82	B	H	H	H	H		1	L	1
83	H	H	H	H	B		1	R				1
84	B	B	B	B	B
85	H	H	H	H	H
86	H	H	H	B	B		1	RC			1
87	H	H	H	H	H
88	H	B	B	B	B		1	L	1
89	B	H	H	H	H		1	L	1
90	B	B	H	H	H		1	LC		1
91	H	H	H	H	H
92	B	B	B	B	B
93	H	H	H	H	H
94	B	H	H	H	B		2	L, R	1			1
95	B	B	B	B	B
96	H	H	H	H	H
97	H	H	H	H	H
98	B	H	H	H	H		1	L	1
99	H	H	H	H	H
100	B	B	B	B	H		1	R				1
101	B	B	B	B	B
102	H	B	B	B	B		1	L	1
103	B	B	B	B	H		1	R				1
104	H	H	H	H	H
105	H	H	H	H	H
106	H	H	H	H	H
107	H	H	H	H	H
108	H	H	H	H	H
109	B	B	B	B	B
110	H	H	H	H	B		1	R				1
111	H	H	H	H	H
112	B	B	B	H	H		1	RC			1
113	H	H	H	B	B		1	RC			1
114	B	B	H	H	H		1	LC		1
115	H	H	H	H	H
116	H	H	H	H	H
117	H	H	H	H	H
118	H	H	H	H	H
119	B	B	B	B	H		1	R				1
120	B	B	B	B	B
121	H	B	B	B	B		1	L	1
122	H	H	H	H	H
123	B	B	B	B	B
124	B	B	B	B	H		1	R				1
125	H	H	H	H	H
126	H	H	H	B	B		1	RC			1
127	H	H	H	H	H
128	B	B	B	B	B
129	H	H	H	H	B		1	R				1
130	B	B	B	B	B
131	B	B	H	H	H		1	LC		1
132	B	B	B	H	H		1	RC			1
133	H	H	H	H	H
134	H	H	H	H	H
135	H	H	H	H	B		1	R				1
136	H	B	B	B	B		1	L	1
137	H	H	H	B	B		1	RC			1
138	B	H	H	H	H		1	L	1
139	H	H	H	H	B		1	R				1
140	B	B	B	B	H		1	R				1
141	H	H	H	H	B		1	R				1
142	B	B	B	B	B
143	H	H	H	H	H
144	H	H	H	H	H
145	B	B	B	B	B
146	H	H	H	H	B		1	R				1
147	B	B	B	B	B
148	H	B	B	B	B		1	L	1
149	B	B	B	B	B
150	H	H	H	H	H
151	B	B	B	B	B
152	H	H	H	B	B		1	RC			1
153	B	B	B	B	B
154	H	H	H	H	B		1	R				1
155	B	H	H	H	H		1	L	1
156	B	B	B	B	B
157	H	H	B	B	B		1	LC		1
158	H	H	H	H	H
159	B	B	B	B	B
160	H	H	H	H	H
161	B	H	H	H	H		1	L	1
162	H	H	H	H	H
163	B	B	B	H	H		1	RC			1
164	B	B	B	B	B
165	B	B	H	H	H		1	LC		1
166	H	H	H	H	B		1	R				1
167	B	B	B	B	B
168	H	H	H	H	H
169	B	H	H	H	H		1	L	1
170	H	B	B	B	B		1	L	1
171	B	B	B	B	B
172	B	B	B	B	B
173	H	H	H	H	H
174	B	H	B	B	B		2	L, LC	1	1
175	B	B	H	H	H		1	LC		1
176	H	H	H	H	H
177	B	H	H	H	H		1	L	1
178	H	H	H	H	H
179	B	B	B	B	B
180	B	B	B	B	B
181	B	B	H	H	H		1	LC		1
182	B	B	B	B	B
183	H	B	B	B	B		1	L	1
184	B	H	H	H	B		2	L, R	1			1
185	B	H	H	H	H		1	L	1
186	B	B	H	H	H		1	LC		1
187	H	B	B	B	B		1	L	1
188	H	H	H	B	B		1	RC			1
n =							188										L	LC	RC	R	sum
total CO							86		29	18	12	27	86		WT(I)	% for domain	33.7209	20.9302	13.9535	31.3953	100
total DCO							5									cM for domain	15.4255	9.57447	6.38298	14.3617	45.7447
total SCO							76
total NCO							107
cM							45.7447
							SCO	L=	24
								LC=	15
								RC=	12
								R=	25

## Sheet: brc-1(V)
	brc-1(V)		MALE
WORM	A	B	C	D	E		#CO	domain	L	LC	RC	R
1	B	H	H	H	H		1	L	1
2	H	H	B	B	B		1	LC		1
3	B	B	B	B	H		1	R				1
4	B	B	B	B	H		1	R				1
5	H	H	H	H	B		1	R				1
6	H	H	H	H	H
7	B	B	B	B	B
8	B	H	H	H	H		1	L	1
9	H	H	H	H	H
10	B	B	B	B	B
11	H	H	H	H	H
12	B	B	B	B	H		1	R				1
13	H	H	H	H	B		1	R				1
14	H	H	B	B	B		1	LC		1
15	B	B	B	H	H		1	RC			1
16	H	H	H	H	H
17	H	B	B	B	B		1	L	1
18	H	B	B	B	H		2	L, R	1			1
19	H	H	H	H	H
20	B	B	B	B	B
21	B	B	B	B	B
22	H	H	B	B	B		1	LC		1
23	B	B	B	B	B
24	B	B	B	H	H		1	RC			1
25	H	H	H	H	H
26	B	B	B	B	B
27	H	H	H	H	H
28	H	H	H	H	H
29	H	H	H	H	H
30	H	H	H	H	B		1	R				1
31	B	B	B	B	H		1	R				1
32	H	B	B	B	B		1	L	1
33	B	B	B	B	B
34	B	H	H	H	H		1	L	1
35	H	B	B	B	B		1	L	1
36	H	H	H	H	H
37	B	B	B	B	H		1	R				1
38	B	B	B	B	B
39	B	B	B	B	B
40	B	B	H	H	H		1	LC		1
41	H	B	B	B	B		1	L	1
42	B	H	H	H	H		1	L	1
43	H	H	H	H	H
44	H	H	H	B	B		1	RC			1
45	H	H	H	H	H
46	B	B	B	B	H		1	R				1
47	B	B	H	H	H		1	LC		1
48	H	B	B	B	B		1	L	1
49	H	H	H	H	B		1	R				1
50	B	B	B	B	B
51	B	B	B	B	B
52	H	H	B	B	B		1	LC		1
53	B	H	H	H	H		1	L	1
54	H	H	H	B	B		1	RC			1
55	H	H	H	H	H
56	H	H	H	H	H
57	H	H	B	B	B		1	LC		1
58	B	B	B	B	B
59	B	B	B	B	B
60	H	H	H	H	H
61	B	H	H	H	H		1	L	1
62	H	B	B	B	B		1	L	1
63	B	B	B	B	B
64	H	H	H	H	H
65	H	B	B	B	B		1	L	1
66	H	H	H	H	H
67	B	H	H	H	H		1	L	1
68	B	B	B	H	H		1	RC			1
69	B	B	B	H	H		1	RC			1
70	H	H	H	H	B		1	R				1
71	B	B	B	B	B
72	H	H	H	H	H
73	B	B	B	B	H		1	R				1
74	B	B	B	B	B
75	H	H	H	H	B		1	R				1
76	B	B	H	H	H		1	LC		1
77	B	B	B	B	B
78	H	H	H	H	H
79	B	B	H	H	H		1	LC		1
80	B	H	H	H	H		1	L	1
81	B	B	B	B	B
82	B	B	B	B	B
83	H	H	H	H	B		1	R				1
84	H	B	B	B	B		1	L	1
85	B	H	H	H	H		1	L	1
86	B	B	B	B	B
87	H	H	H	H	H
88	B	B	H	H	H		1	LC		1
89	B	H	H	H	H		1	L	1
90	H	B	B	B	B		1	L	1
91	B	B	B	B	B
92	B	B	B	B	H		1	R				1
93	H	H	H	H	H
94	H	H	H	H	B		1	R				1
95	B	B	B	H	H		1	RC			1
96	H	H	H	H	H
97	B	H	H	H	H		1	L	1
98	B	B	B	B	H		1	R				1
99	H	H	H	H	H
100	H	H	H	H	H
101	B	B	B	B	H		1	R				1
102	H	H	H	H	H
103	H	H	H	H	H
104	H	B	B	B	B		1	L	1
105	B	H	H	H	H		1	L	1
106	B	B	B	B	B
107	B	B	B	H	H		1	RC			1
108	B	H	H	H	H		1	L	1
109	H	H	H	H	H
110	H	H	H	B	B		1	RC			1
111	B	H	H	H	H		1	L	1
112	H	H	H	H	B		1	R				1
113	B	B	B	B	B
114	H	H	H	H	H
115	B	B	B	B	H		1	R				1
116	B	H	H	H	H		1	L	1
117	H	B	B	B	B		1	L	1
118	B	B	B	B	B
119	B	H	H	H	H		1	L	1
120	B	B	B	B	B
121	H	H	H	H	H
122	H	H	H	H	H
123	B	B	B	H	H		1	RC			1
124	H	H	B	B	B		1	LC		1
125	B	B	B	B	H		1	R				1
126	H	H	H	H	B		1	R				1
127	B	B	B	B	B
128	H	H	H	H	H
129	B	H	H	H	H		1	L	1
130	B	B	B	B	B
131	H	H	H	H	B		1	R				1
132	B	B	B	B	B
133	B	B	B	B	B
134	B	H	H	H	H		1	L	1
135	H	H	H	H	X	DISCARD
136	B	B	B	B	B
137	H	H	H	H	H
138	B	H	X	H	H	DISCARD
139	B	B	B	B	B
140	B	B	B	B	B
141	B	B	B	B	H		1	R				1
142	H	H	H	H	B		1	R				1
143	H	H	H	H	H
144	H	B	B	B	B		1	L	1
145	B	H	H	H	H		1	L	1
146	B	B	B	B	B
147	B	B	B	B	B
148	B	B	B	B	B
149	B	B	B	B	H		1	R				1
150	B	B	B	B	B
151	H	H	H	B	B		1	RC			1
152	B	B	B	B	B
153	B	B	B	B	H		1	R				1
154	B	B	B	B	B
155	B	B	B	B	H		1	R				1
156	B	H	H	H	H		1	L	1
157	H	H	H	H	H
158	H	B	B	B	B		1	L	1
159	H	B	B	B	B		1	L	1
160	B	B	B	B	H		1	R				1
161	H	H	H	H	H
162	B	B	B	H	H		1	RC			1
163	H	B	B	B	B		1	L	1
164	B	B	B	B	B
165	B	B	B	B	B
166	H	H	H	H	H
167	H	H	H	H	H
168	B	B	B	B	B
169	B	B	B	B	B
170	H	B	B	B	B		1	L	1
171	B	B	B	B	B
172	H	H	H	H	H
173	H	H	H	H	H
174	H	B	B	B	B		1	L	1
175	H	H	H	H	H
176	B	B	B	B	B
177	B	B	B	B	B
178	B	B	B	B	B
179	H	H	H	H	H
180	B	B	B	B	B
181	H	B	B	B	B		1	L	1
182	H	H	H	H	H
183	H	H	H	H	H
184	B	B	H	H	H		1	LC		1
185	B	B	B	B	B
n=							183										L	LC	RC	R	sum
total CO							93		39	12	12	30	93		brc-1 (V)	% for domain	41.9355	12.9032	12.9032	32.2581	100
total DCO							1									cM for domain	21.3115	6.55738	6.55738	16.3934	50.8197
total SCO							91
total NCO							91
cM							50.8197
							SCO	L=	38
								LC=	12
								RC=	12
								R=	29

## Sheet: brc-1 (I)
	brc-1(I)		MALE
WORM	A	B	C	D	E		#CO	domain	L	LC	RC	R
1	B	H	H	H	H		1	L	1
2	B	B	B	B	B
3	B	B	B	B	B
4	B	H	H	H	H		1	L	1
5	H	H	B	B	B		1	LC		1
6	H	B	B	H	H		2	L, RC	1		1
7	H	H	B	B	B		1	LC		1
8	H	H	H	B	B		1	RC			1
9	B	B	B	B	B
10	B	B	H	H	H		1	LC		1
11	B	B	B	B	B
12	B	B	B	B	B
13	B	B	B	H	H		1	RC			1
14	B	B	B	H	H		1	RC			1
15	H	H	H	H	B		1	R				1
16	H	H	H	H	B		1	R				1
17	H	H	H	H	H
18	H	H	H	H	H
19	B	B	B	B	B
20	B	B	B	B	B
21	H	H	H	H	H
22	B	B	B	H	H		1	RC			1
23	H	H	H	H	B		1	R				1
24	H	H	H	H	H
25	B	B	B	H	H		1	RC			1
26	B	B	H	H	H		1	LC		1
27	B	B	B	B	B
28	B	B	B	B	B
29	B	B	B	B	B
30	H	H	H	H	H
31	B	B	B	H	H		1	RC			1
32	H	H	H	B	B		1	RC			1
33	B	B	B	B	B
34	H	H	H	H	H
35	H	H	H	H	H
36	H	H	H	H	H
37	H	H	H	H	H
38	B	H	H	H	H		1	L	1
39	B	B	B	B	H		1	R				1
40	B	B	B	B	B
41	B	B	B	B	B
42	B	B	B	B	H		1	R				1
43	B	B	B	H	H		1	RC			1
44	H	H	H	H	H
45	B	B	B	B	B
46	B	B	B	B	B
47	B	B	B	B	B
48	H	H	H	H	H
49	H	H	B	B	B		1	LC		1
50	B	B	H	H	H		1	LC		1
51	H	H	H	H	H
52	B	B	B	B	B
53	H	H	H	B	B		1	RC			1
54	H	H	H	H	H
55	H	H	H	H	H
56	B	B	B	H	H		1	RC			1
57	H	H	H	H	H
58	B	B	B	B	B
59	B	B	B	H	H		1	RC			1
60	H	H	H	H	H
61	H	B	B	B	H		2	L, R	1			1
62	H	H	H	H	H
63	B	B	B	B	B
64	B	H	H	H	H		1	L	1
65	H	H	H	H	H
66	B	B	B	B	B
67	H	H	H	H	B		1	R				1
68	B	B	B	H	H		1	RC			1
69	B	B	B	B	B
70	H	H	H	H	B		1	R				1
71	H	H	H	H	B		1	R				1
72	H	H	H	H	H
73	B	B	B	B	B
74	H	H	H	H	H
75	H	H	H	H	H
76	H	B	B	B	B		1	L	1
77	H	H	H	B	B		1	RC			1
78	H	H	H	H	B		1	R				1
79	B	B	B	B	B
80	H	B	B	B	B		1	L	1
81	B	H	H	H	H		1	L	1
82	H	H	B	B	B		1	LC		1
83	B	B	B	B	H		1	R				1
84	B	B	B	B	B
85	B	B	B	B	H		1	R				1
86	B	B	B	B	B
87	B	B	B	B	B
88	H	H	H	B	B		1	RC			1
89	H	H	B	B	B		1	LC		1
90	B	B	B	B	B
91	B	B	B	H	H		1	RC			1
92	B	B	B	B	H		1	R				1
93	B	B	B	H	H		1	RC			1
94	B	B	B	B	B
95	H	H	H	B	B		1	RC			1
96	H	H	H	H	H
97	H	H	H	H	H
98	H	H	H	H	H
99	H	H	H	B	B		1	RC			1
100	B	H	H	H	H		1	L	1
101	H	H	H	B	B		1	RC			1
102	H	H	H	B	B		1	RC			1
103	H	H	H	H	B		1	R				1
104	H	H	H	H	H
105	H	H	H	H	H
106	B	B	H	H	H		1	LC		1
107	B	B	B	B	B
108	H	B	B	B	B		1	L	1
109	B	H	H	H	H		1	L	1
110	B	B	H	H	H		1	LC		1
111	H	B	B	B	B		1	L	1
112	B	B	B	B	B
113	H	H	H	H	H
114	B	B	H	H	H		1	LC		1
115	B	B	B	B	B
116	B	H	H	H	H		1	L	1
117	B	B	B	B	B
118	H	H	B	B	B		1	LC		1
119	B	B	B	B	B
120	H	H	H	B	B		1	RC			1
121	B	B	B	H	H		1	RC			1
122	H	H	H	H	H
123	H	H	B	B	B		1	LC		1
124	B	B	B	B	B
125	B	B	H	H	H		1	LC		1
126	H	H	H	H	H
127	H	H	H	B	B		1	RC			1
128	B	B	B	B	B
129	H	H	H	H	B		1	R				1
130	H	H	H	H	H
131	H	H	H	H	H
132	B	B	B	B	B
133	B	B	B	B	B
134	B	B	B	H	H		1	RC			1
135	H	B	B	B	B		1	L	1
136	H	H	H	H	H
137	B	B	H	H	H		1	LC		1
138	H	H	H	H	H
139	H	H	H	H	H
140	H	H	H	H	H
141	B	B	B	B	B
142	B	B	B	B	B
143	B	B	B	H	H		1	RC			1
144	B	B	B	H	H		1	RC			1
145	B	B	B	H	H		1	RC			1
146	H	H	H	H	H
147	B	B	B	B	B
148	B	B	B	B	B
149	B	B	B	B	B
150	B	B	B	B	B
151	H	H	H	H	H
152	B	B	B	B	B
153	H	H	H	H	H
154	H	H	B	B	B		1	LC		1
155	B	H	H	H	H		1	L	1
156	B	B	B	B	B
157	B	B	H	H	H		1	LC		1
158	H	H	H	H	H
159	B	B	B	B	B
160	H	H	H	H	B		1	R				1
161	H	H	B	B	B		1	LC		1
162	H	H	H	H	H
163	H	H	B	B	B		1	LC		1
164	B	H	H	H	H		1	L	1
165	H	B	B	B	B		1	L	1
166	B	H	H	H	H		1	L	1
167	H	H	H	H	B		1	R				1
168	H	H	H	H	B		1	R				1
169	H	H	H	H	B		1	R				1
170	B	H	H	H	H		1	L	1
171	H	H	H	H	H
172	B	B	B	B	B
173	B	B	B	B	H		1	R				1
174	B	B	B	H	H		1	RC			1
175	H	H	H	H	B		1	R				1
176	H	B	B	B	B		1	L	1
177	B	H	H	H	H		1	L	1
178	B	H	H	H	H		1	L	1
179	B	B	H	H	H		1	LC		1
180	H	H	H	H	H
181	H	B	B	B	B		1	L	1
182	H	B	B	B	B		1	L	1
183	H	H	H	H	B		1	R				1
184	H	H	H	H	H
n=							184										L	LC	RC	R	sum
total CO							96		25	20	29	22	96		brc-1(I)	% for domain	26.0417	20.8333	30.2083	22.9167	100
total DCO							2									cM for domain	13.587	10.8696	15.7609	11.9565	52.1739
total SCO							92
total NCO							90
cM							52.1739
							SCO	L=	23
								LC=	20
								RC=	28
								R=	21

## Sheet: zim-1(V)
	zim-1(V)		MALE
embryos/worms	A	B	C	D	E		#CO	domain	L	LC	RC	R
1	H	H	H	H	B		1	R				1
2	H	H	H	H	H
3	B	B	B	H	H		1	RC			1
4	H	H	H	H	H
5	B	B	B	B	B
6	H	H	H	B	B		1	RC			1
7	B	H	H	H	H		1	L	1
8	B	B	B	B	B
9	H	H	H	H	B		1	R				1
10	B	B	B	B	B
11	B	B	B	B	B
12	B	B	B	B	B
13	B	B	B	H	H		1	RC			1
14	B	B	B	H	H		1	RC			1
15	B	B	B	B	B
16	B	B	B	B	B
17	H	B	H	X	X	DISCARD
18	B	B	B	B	B
19	B	H	H	H	H		1	L	1
20	B	B	B	B	B
21	B	B	B	B	B
22	H	H	H	H	H
23	B	B	H	H	H		1	LC		1
24	B	B	B	B	H		1	R				1
25	H	H	H	H	H
26	B	B	B	B	B
27	H	H	H	B	B		1	RC			1
28	H	H	H	H	B		1	R				1
29	B	H	H	H	H		1	L	1
30	B	B	B	B	H		1	R				1
31	B	H	H	H	B		2	L, R	1			1
32	H	H	H	H	H
33	H	H	H	H	H
34	H	H	H	H	H
35	B	B	B	B	B
36	H	H	H	B	B		1	RC			1
37	H	H	H	H	H
38	B	B	B	B	H		1	R				1
39	H	H	H	B	B		1	RC			1
40	B	B	B	B	B
41	B	B	B	B	B
42	H	H	H	H	H
43	B	B	B	B	B
44	B	B	B	B	B
45	H	H	H	B	B		1	RC			1
46	H	H	H	H	B		1	R				1
47	H	H	H	H	H
48	H	H	H	B	B		1	RC			1
49	H	B	B	B	B		1	L	1
50	H	H	B	B	B		1	LC		1
51	H	H	B	B	B		1	LC		1
52	H	H	H	H	H
53	B	H	H	H	H		1	L	1
54	H	H	H	H	H
55	B	B	B	B	H		1	R				1
56	B	B	B	B	B
57	B	B	B	B	B
58	B	B	B	B	B
59	H	B	B	B	B		1	L	1
60	B	B	B	B	B
61	H	H	H	H	H
62	B	B	B	B	B
63	B	B	B	H	H		1	RC			1
64	B	H	H	H	H		1	L	1
65	H	H	H	H	H
66	H	B	B	B	H		2	L, R	1			1
67	B	B	B	B	H		1	R				1
68	H	H	B	B	B		1	LC		1
69	H	H	H	H	B		1	R				1
70	H	H	H	H	H
71	B	B	H	H	H		1	LC		1
72	B	B	B	B	B
73	B	B	B	H	H		1	RC			1
74	B	B	H	H	H		1	LC		1
75	H	H	H	H	H
76	B	H	H	H	H		1	L	1
77	H	H	H	B	B		1	RC			1
78	H	H	H	H	B		1	R				1
79	H	H	H	B	B		1	RC			1
80	H	H	H	H	H
81	B	B	B	B	B
82	B	B	B	B	B
83	H	H	H	H	H
84	B	H	H	H	H		1	L	1
85	B	B	B	B	B
86	H	H	H	H	H
87	H	H	H	H	H
88	B	B	H	H	H		1	LC		1
89	H	H	H	H	B		1	R				1
90	B	H	H	H	H		1	L	1
91	B	B	B	B	B
92	B	B	B	H	H		1	RC			1
93	B	B	B	B	B
94	H	H	B	B	B		1	LC		1
95	H	H	H	H	H
96	H	H	H	H	H
97	H	H	B	B	H		2	LC, R		1		1
98	B	B	B	B	H		1	R				1
99	H	B	B	B	B		1	L	1
100	H	H	H	H	H
101	B	B	B	B	B
102	H	H	H	H	H
103	H	H	H	H	H
104	B	B	B	B	B
105	B	B	B	B	B
106	H	H	H	H	H
107	B	B	B	B	H		1	R				1
108	H	B	B	B	B		1	L	1
109	B	H	H	B	B		2	L, RC	1		1
110	B	X	B	B	B	DISCARD
111	B	B	H	H	H		1	LC		1
112	B	H	H	H	B		2	L, R	1			1
113	H	H	H	B	B		1	RC			1
114	H	H	B	B	B		1	LC		1
115	B	B	B	B	H		1	R				1
116	H	X	H	H	H	DISCARD
117	B	B	B	B	B
118	H	X	B	B	B	DISCARD
119	B	B	B	B	H		1	R				1
120	B	B	B	B	B
121	H	H	H	H	H
122	H	H	H	H	B		1	R				1
123	H	H	H	H	B		1	R				1
124	H	H	H	H	H
125	H	H	H	H	B		1	R				1
126	H	H	H	B	B		1	RC			1
127	H	X	B	H	H	DISCARD
128	B	B	B	B	B
129	H	H	H	H	H
130	B	B	B	B	H		1	R				1
131	B	B	H	H	H		1	LC		1
132	B	X	B	B	B	DISCARD
133	H	H	H	H	B		1	R				1
134	H	H	H	B	B		1	RC			1
135	B	B	B	B	B
136	H	X	H	H	H	DISCARD
137	B	B	H	H	H		1	LC		1
138	H	H	H	H	H
139	B	H	H	H	H		1	L	1
140	B	B	B	B	B
141	B	B	H	H	B		2	LC, R		1		1
142	B	B	B	H	H		1	RC			1
143	B	B	B	B	B
144	B	B	B	B	B
145	H	H	H	H	H
146	B	B	B	B	B
147	B	B	B	B	B
148	H	H	H	H	B		1	R				1
149	B	B	B	B	B
150	H	H	H	H	H
151	H	H	H	H	B		1	R				1
152	H	B	B	B	B		1	L	1
153	B	B	B	B	B
154	B	B	B	B	H		1	R				1
155	H	H	H	H	H
156	H	B	B	B	B		1	L	1
157	H	B	B	H	H		2	L, RC	1		1
158	B	B	B	B	B
159	H	H	H	H	H
160	B	B	B	B	H		1	R				1
161	H	H	H	H	H
162	H	H	H	H	B		1	R				1
163	B	H	H	H	H		1	L	1
164	H	B	B	B	H		2	L, R	1			1
165	H	B	B	B	B		1	L	1
166	B	B	B	B	B
167	H	B	B	H	H		2	L, RC	1		1
168	B	H	H	H	H		1	L	1
169	B	B	H	H	H		1	LC		1
170	H	B	B	B	B		1	L	1
171	H	H	H	H	H
172	H	H	H	H	H
173	H	H	H	H	H
174	B	B	B	B	B
175	H	H	H	H	H
176	B	B	B	B	H		1	R				1
177	B	H	H	H	B		2	L, R	1			1
178	B	B	B	B	B
179	H	B	B	B	B		1	L	1
180	H	H	H	H	B		1	R				1
181	H	H	H	H	B		1	R				1
182	H	H	H	H	H
183	H	H	H	H	B		1	R				1
184	H	H	H	H	B		1	R				1
185	H	H	H	H	B		1	R				1
186	H	H	H	H	H
187	B	B	B	B	B
188	B	B	B	B	H		1	R				1
189	H	H	H	H	H
190	H	H	H	H	B		1	R				1
191	B	H	B	B	B		2	L, LC	1	1
192	H	H	H	H	H
193	H	B	B	B	H		2	L, R	1			1
194	B	B	B	B	B
195	H	B	B	B	H		2	L, R	1			1
196	B	B	B	B	B
197	H	B	B	B	B		1	L	1
198	B	B	B	H	H		1	RC			1
199	H	H	H	H	H
200	B	H	H	H	H		1	L	1
201	H	H	H	H	H
202	H	H	B	H	H		2	LC, RC		1	1
203	B	B	B	B	B
204	H	H	H	H	H
205	B	B	B	B	B
206	B	H	H	H	H		1	L	1
207	H	H	H	H	H
208	H	H	B	B	B		1	LC		1
209	H	B	B	B	H		2	L, R	1			1
210	B	H	H	H	H		1	L	1
211	B	B	B	H	H		1	RC			1
212	B	B	B	B	H		1	R				1
213	H	B	B	B	B		1	L	1
214	B	B	B	H	H		1	RC			1
215	H	B	B	B	B		1	L	1
216	B	B	B	B	B
217	B	H	H	H	H		1	L	1
218	H	H	H	H	H
219	B	B	H	H	H		1	LC		1
220	H	H	H	B	B		1	RC			1
221	H	H	H	H	B		1	R				1
222	H	H	B	H	B		3	LC, RC, R		1	1	1
223	H	H	H	H	H
224	B	B	B	H	H		1	RC			1
225	B	H	H	H	H		1	L	1
226	B	B	X	B	B	DISCARD
227	H	H	H	H	H
228	B	H	H	H	H		1	L	1
229	H	H	H	H	H
230	H	H	H	H	H
231	B	B	B	B	B
232	H	H	H	H	B		1	R				1
233	H	H	B	B	B		1	LC		1
234	B	H	H	H	H		1	L	1
235	H	B	B	B	B		1	L	1
236	B	B	B	B	B
237	B	H	H	H	H		1	L	1
238	B	B	B	B	H		1	R				1
239	H	B	B	B	B		1	L	1
240	B	B	B	B	B
241	H	H	H	B	B		1	RC			1
242	H	B	B	B	B		1	L	1
243	B	B	B	B	B
244	B	B	B	B	B
245	B	B	B	B	B
246	H	H	H	H	H
247	H	H	H	H	H
248	H	H	H	H	H
249	B	B	B	H	H		1	RC			1
250	B	B	B	B	B
251	B	H	H	H	B		2	L, R	1			1
252	B	B	B	H	H		1	RC			1
253	H	H	H	H	B		1	R				1
254	H	B	B	B	B		1	L	1
255	H	B	B	B	B		1	L	1
256	B	B	B	B	B
257	H	H	B	B	B		1	LC		1
258	H	H	H	B	B		1	RC			1
259	B	H	H	B	B		2	L, RC	1		1
260	H	B	B	B	B		1	L	1
261	B	B	B	B	B
262	H	B	B	B	B		1	L	1
263	H	B	B	B	B		1	L	1
264	H	H	H	H	H
265	H	H	H	H	H
266	B	B	B	B	B
267	H	H	H	H	H
268	H	H	H	B	B		1	RC			1
269	H	H	H	H	H
270	B	B	H	H	H		1	LC		1
271	B	H	H	H	H		1	L	1
272	H	H	B	B	B		1	LC		1
273	H	H	H	H	B		1	R				1
274	B	B	H	H	H		1	LC		1
275	H	H	H	H	H
276	H	H	H	H	H
277	B	B	B	B	B
278	B	B	B	B	B
n=							270										L	LC	RC	R	sum
total CO							165		54	25	34	52	165		zim-1(V)	% for domain	32.7273	15.1515	20.6061	31.5152	100
total TCO							1									cM for domain	20	9.25926	12.5926	19.2593	61.1111
total DCO							17
total SCO							128
total NCO							124
cM							61.1111
							SCO	L=	40
								LC=	20
								RC=	28
								R=	40

## Sheet: zim-1 (I)
	zim-1(I)		MALE
WORM/embryo	A	B	C	D	E		#CO	domain	L	LC	RC	R
1	B	B	B	B	B
2	B	B	B	B	B
3	B	B	B	B	H		1	R				1
4	B	B	B	H	H		1	RC			1
5	H	B	B	B	B		1	L	1
6	B	B	B	B	B
7	B	B	B	B	B
8	H	H	H	H	B		1	R				1
9	B	B	B	B	B
10	B	B	B	B	H		1	R				1
11	H	H	B	B	B		1	LC		1
12	H	H	H	H	H
13	B	B	B	B	H		1	R				1
14	H	H	H	H	B		1	R				1
15	B	B	B	B	H		1	R				1
16	H	H	H	B	B		1	RC			1
17	B	B	B	B	B
18	B	B	B	B	B
19	H	B	B	B	B		1	L	1
20	H	B	B	H	H		2	L, RC	1		1
21	H	H	H	B	B		1	RC			1
22	B	B	B	B	B
23	H	H	B	B	B		1	LC		1
24	H	B	B	B	B		1	L	1
25	H	H	H	H	H
26	H	H	B	B	H		2	LC, R		1		1
27	B	B	B	H	H		1	RC			1
28	B	B	B	B	B
29	H	H	H	H	H
30	H	H	H	H	B		1	R				1
31	H	H	H	H	H
32	H	H	B	B	B		1	LC		1
33	H	H	H	H	H
34	H	H	H	B	B		1	RC			1
35	H	H	H	B	B		1	RC			1
36	B	B	B	B	B
37	B	B	B	B	H		1	R				1
38	B	H	H	H	B		2	L, R	1			1
39	B	H	H	H	H		1	L	1
40	H	B	B	B	B		1	L	1
41	B	B	B	B	B
42	H	H	H	H	H
43	H	H	B	B	B		1	LC		1
44	H	B	B	B	B		1	L	1
45	B	B	B	B	B
46	H	H	H	H	B		1	R				1
47	H	H	H	H	H
48	B	B	H	H	H		1	LC		1
49	H	H	H	H	H
50	B	H	H	H	H		1	L	1
51	B	B	B	B	B
52	B	B	H	H	H		1	LC		1
53	B	B	B	B	H		1	R				1
54	B	B	B	H	H		1	RC			1
55	B	B	H	H	H		1	LC		1
56	X	X	X	B	X	DISCARD
57	H	B	B	B	B		1	L	1
58	H	B	B	B	B		1	L	1
59	B	B	B	B	B
60	H	H	H	H	H
61	B	B	B	H	H		1	RC			1
62	H	H	H	B	B		1	RC			1
63	H	H	B	B	B		1	LC		1
64	B	B	B	B	H		1	R				1
65	H	H	H	B	B		1	RC			1
66	H	X	H	X	B	DISCARD
67	B	H	H	H	H		1	L	1
68	B	B	B	H	H		1	RC			1
69	H	B	B	B	B		1	L	1
70	B	B	B	H	H		1	RC			1
71	B	H	H	H	H		1	L	1
72	H	B	B	H	H		2	L, RC	1		1
73	B	B	B	H	H		1	RC			1
74	H	H	H	H	H
75	H	H	H	H	H
76	B	B	B	B	H		1	R				1
77	H	H	H	H	H
78	B	B	B	B	B
79	H	B	B	B	B		1	L	1
80	X	X	X	X	X	DISCARD
81	B	B	B	B	H		1	R				1
82	X	B	B	B	B	DISCARD
83	H	H	H	H	H
84	B	B	B	B	B
85	H	H	H	H	H
86	H	H	H	H	B		1	R				1
87	H	H	H	H	H
88	H	H	H	H	H
89	H	B	B	B	B		1	L	1
90	B	B	B	B	B
91	B	B	B	B	B
92	H	H	H	B	B		1	RC			1
93	B	B	B	H	H		1	RC			1
94	H	H	H	B	B		1	RC			1
95	H	H	H	H	H
96	H	H	H	H	H
97	H	B	B	B	B		1	L	1
98	H	H	H	H	H
99	H	H	B	B	B		1	LC		1
100	H	H	H	H	H
101	H	H	H	B	B		1	RC			1
102	H	H	H	H	H
103	H	B	B	B	B		1	L	1
104	H	H	H	H	B		1	R				1
105	B	B	H	H	H		1	LC		1
106	H	B	B	H	H		2	L, RC	1		1
107	X	B	X	X	X	DISCARD
108	B	B	B	B	B
109	B	B	X	B	B	DISCARD
110	B	B	B	B	B
111	B	B	B	B	B
112	B	H	H	H	H		1	L	1
113	H	H	H	H	H
114	H	H	H	H	B		1	R				1
115	B	B	B	B	H		1	R				1
116	X	X	X	X	X	DISCARD
117	H	X	X	B	B	DISCARD
118	H	H	H	H	H
119	B	B	B	H	H		1	RC			1
120	B	H	H	H	H		1	L	1
121	H	H	B	B	B		1	LC		1
122	B	B	B	B	B
123	B	B	H	H	H		1	LC		1
124	B	H	H	H	H		1	L	1
125	H	B	B	B	B		1	L	1
126	H	H	H	H	B		1	R				1
127	B	H	H	H	H		1	L	1
128	B	B	B	H	H		1	RC			1
129	B	H	H	H	H		1	L	1
130	B	B	B	B	B
131	B	H	H	H	H		1	L	1
132	H	H	H	H	H
133	B	H	H	B	B		2	L, RC	1		1
134	H	H	H	H	B		1	R				1
135	B	B	B	B	B
136	H	H	H	B	B		1	RC			1
137	B	H	H	H	H		1	L	1
138	H	H	H	H	H
139	H	B	B	B	B		1	L	1
140	B	H	H	H	H		1	L	1
141	H	H	B	B	B		1	LC		1
142	B	B	B	B	B
143	H	B	B	B	B		1	L	1
144	B	B	B	B	B
145	B	B	B	B	B
146	B	H	H	H	H		1	L	1
147	H	H	H	H	H
148	B	B	B	B	H		1	R				1
149	B	B	H	H	H		1	LC		1
150	B	B	B	B	H		1	R				1
151	H	H	H	B	B		1	RC			1
152	B	B	B	B	B
153	B	B	B	H	H		1	RC			1
154	B	B	B	H	H		1	RC			1
155	H	H	H	H	H
156	B	B	B	B	B
157	H	H	H	H	H
158	B	H	H	H	H		1	L	1
159	B	B	B	B	B
160	B	B	B	H	H		1	RC			1
161	B	B	B	B	B
162	B	B	B	B	B
163	H	H	B	B	B		1	LC		1
164	H	H	H	H	H
165	H	H	B	B	B		1	LC		1
166	H	H	H	B	B		1	RC			1
167	B	H	H	H	H		1	L	1
168	B	B	B	B	B
169	B	B	B	B	B
170	B	H	H	H	H		1	L	1
171	H	H	H	H	H
172	H	H	H	H	H
173	H	H	H	H	H
174	B	B	B	B	B
175	B	B	B	B	B
176	B	B	B	B	H		1	R				1
177	B	B	B	B	B
178	B	B	B	B	H		1	R				1
179	H	H	H	H	H
180	B	B	B	B	B
181	B	B	B	B	B
182	H	H	H	H	H
183	H	B	B	B	B		1	L	1
184	H	H	H	H	H
185	H	H	H	H	B		1	R				1
186	H	B	B	B	B		1	L	1
187	H	H	H	B	B		1	RC			1
188	H	H	H	B	B		1	RC			1
189	H	B	B	B	B		1	L	1
190	H	H	H	H	H
191	H	H	H	B	H		2	RC, R			1	1
192	H	H	H	H	H
193	B	H	H	H	H		1	L	1
194	B	H	H	H	B		2	L, R	1			1
195	B	B	B	B	B
196	B	B	B	H	H		1	RC			1
197	H	B	B	B	B		1	L	1
198	B	B	B	B	B
199	H	H	H	H	H
200	H	H	H	B	B		1	RC			1
201	B	H	H	H	H		1	L	1
202	H	H	H	H	H
203	H	H	H	H	H
204	B	B	H	H	H		1	LC		1
205	B	B	B	B	B
206	B	B	H	H	H		1	LC		1
207	B	B	B	B	B
208	B	B	B	B	B
209	B	B	B	B	B
210	B	B	H	H	H		1	LC		1
211	H	B	B	B	B		1	L	1
212	B	B	B	B	B
213	B	B	B	B	B
214	B	B	B	B	B
215	B	B	B	B	H		1	R				1
216	B	B	B	B	B
217	B	H	H	H	H		1	L	1
218	B	B	B	H	H		1	RC			1
219	H	H	H	H	H
220	B	B	B	H	H		1	RC			1
221	H	H	B	B	B		1	LC		1
222	B	B	B	H	H		1	RC			1
223	B	B	H	H	H		1	LC		1
224	B	B	B	B	B
225	H	H	B	B	B		1	LC		1
226	H	B	B	B	B		1	L	1
227	B	H	H	H	H		1	L	1
228	H	B	B	B	B		1	L	1
229	H	H	H	H	B		1	R				1
230	B	H	H	H	H		1	L	1
231	H	B	B	B	B		1	L	1
232	B	B	B	H	H		1	RC			1
233	H	H	H	H	H
234	H	H	H	H	H
235	H	H	H	B	B		1	RC			1
236	B	B	H	H	H		1	LC		1
237	H	H	H	H	H
238	H	H	H	H	H
239	B	B	H	H	H		1	LC		1
240	B	B	B	B	B
241	H	H	H	H	H
242	B	B	B	B	B
243	B	B	B	B	B
244	B	B	B	B	B
245	B	H	H	H	B		2	L, R	1			1
246	H	B	B	B	B		1	L	1
247	H	H	H	H	H
248	H	H	B	B	B		1	LC		1
249	H	H	H	H	B		1	R				1
250	B	B	B	B	B
251	B	B	H	H	H		1	LC		1
252	B	B	B	B	B
253	B	H	H	H	H		1	L	1
254	B	B	H	H	H		1	LC		1
255	B	B	B	H	H		1	RC			1
256	H	H	B	B	B		1	LC		1
257	B	H	H	H	H		1	L	1
258	B	H	H	H	H		1	L	1
259	H	H	B	B	B		1	LC		1
260	H	B	B	B	B		1	L	1
261	H	H	H	H	H
262	B	B	H	H	H		1	LC		1
263	H	H	B	B	B		1	LC		1
264	H	H	H	H	H
265	H	H	H	H	H
266	B	B	B	B	H		1	R				1
267	H	H	H	H	H
268	H	H	B	B	B		1	LC		1
269	H	B	B	B	B		1	L	1
270	H	H	H	H	H
271	B	B	B	B	B
272	H	H	H	H	H
273	B	B	H	H	H		1	LC		1
274	H	H	H	H	H
275	B	B	B	B	B
276	H	H	H	H	B		1	R				1
n=							268										L	LC	RC	R	sum
total CO							165		57	34	40	34	165		zim-1(I)	% for domain	34.5455	20.6061	24.2424	20.6061	100
total TCO							0									cM for domain	21.2687	12.6866	14.9254	12.6866	61.5672
total DCO							9
total SCO							147
total NCO							112
cM							61.5672
							SCO	L=	50
								LC=	33
								RC=	35
								R=	29

## Sheet: brc-1 zim-1(V)
	brc-1 zim-1 (V)			male
WORM	A	B	C	D	E		#CO	domain	L	LC	RC	R
1	B	X	H	H	H	DISCARD
2	B	X	H	H	B	DISCARD
3	H	H	H	H	H
4	B	B	B	B	B
5	H	H	H	H	H
6	H	H	H	H	H
7	H	H	H	H	H
8	H	H	H	H	H
9	B	B	B	B	B
10	B	B	B	B	H		1	R				1
11	H	H	H	H	H
12	H	H	B	B	B		1	LC		1
13	H	H	H	H	B		1	R				1
14	H	H	H	H	H
15	H	B	B	B	B		1	L	1
16	B	X	B	H	H	DISCARD
17	H	H	H	H	H
18	B	X	B	B	B	DISCARD
19	H	H	H	H	B		1	R				1
20	H	H	H	H	B		1	R				1
21	H	B	B	B	B		1	L	1
22	H	H	H	H	B		1	R				1
23	H	H	H	H	H
24	H	H	H	H	H
25	B	X	B	B	B	DISCARD
26	B	B	B	B	B
27	B	B	B	B	H		1	R				1
28	H	H	H	H	H
29	H	H	B	B	B		1	LC		1
30	B	B	B	B	B
31	B	B	B	B	B
32	H	H	H	H	H
33	H	H	H	H	B		1	R				1
34	B	B	B	H	B		2	RC, R			1	1
35	H	H	H	H	H
36	H	H	B	B	H		2	LC, R		1		1
37	H	H	B	B	B		1	LC		1
38	B	B	B	B	B
39	B	X	H	H	H	DISCARD
40	H	H	H	H	H
41	H	X	B	B	B	DISCARD
42	H	H	H	H	H
43	H	X	B	H	H	DISCARD
44	H	B	H	H	H		2	L, LC	1	1
45	B	B	B	B	B
46	B	B	H	H	H		1	LC		1
47	H	H	H	H	H
48	H	B	B	H	H		2	L, RC	1		1
49	B	B	B	H	H		1	RC			1
50	H	H	H	H	H
51	B	H	H	H	H		1	L	1
52	H	H	H	H	H
53	B	H	H	H	H		1	L	1
54	H	H	H	B	B		1	RC			1
55	H	X	H	H	H	DISCARD
56	H	B	B	B	B		1	L	1
57	H	H	H	B	B		1	RC			1
58	B	H	H	H	H		1	L	1
59	H	X	H	H	H	DISCARD
60	B	H	H	H	H		1	L	1
61	B	B	B	B	B
62	H	H	B	B	B		1	LC		1
63	H	H	H	H	H
64	B	H	H	H	H		1	L	1
65	B	B	H	H	H		1	LC		1
66	B	B	B	B	H		1	R				1
67	H	X	H	H	H	DISCARD
68	H	X	H	H	H	DISCARD
69	B	B	B	B	B
70	H	B	B	B	H		2	L, R	1			1
71	H	H	H	B	B		1	RC			1
72	H	H	H	H	B		1	R				1
73	B	B	B	B	B
74	B	H	H	H	H		1	L	1
75	H	H	H	H	H
76	B	B	B	B	H		1	R				1
77	B	B	B	B	H		1	R				1
78	B	B	B	H	H		1	RC			1
79	B	B	H	H	H		1	LC		1
80	H	H	H	H	H
81	B	B	B	B	H		1	R				1
82	B	B	B	B	H		1	R				1
83	H	H	H	H	H
84	B	H	H	H	B		2	L, R	1			1
85	B	B	H	H	H		1	LC		1
86	B	B	B	B	H		1	R				1
87	B	B	B	B	H		1	R				1
88	H	X	H	H	X	DISCARD
89	H	H	H	B	B		1	RC			1
90	H	H	H	B	B		1	RC			1
91	H	H	H	B	B		1	RC			1
92	B	B	B	B	B
93	H	H	H	H	B		1	R				1
94	B	B	B	B	H		1	R				1
95	B	B	B	B	H		1	R				1
96	H	H	H	H	B		1	R				1
97	H	H	H	H	B		1	R				1
98	H	H	H	H	H
99	B	B	B	H	H		1	RC			1
100	B	B	B	B	B
101	B	B	B	B	H		1	R				1
102	B	B	B	B	B
103	B	H	H	H	H		1	L	1
104	B	B	B	B	B
105	H	H	H	H	H
106	H	H	H	H	H
107	H	H	B	B	B		1	LC		1
108	B	H	H	H	H		1	L	1
109	B	H	H	H	H		1	L	1
110	B	H	H	H	H		1	L	1
111	H	H	H	B	H		2	RC, R			1	1
112	B	H	H	H	H		1	L	1
113	H	B	B	B	B		1	L	1
114	H	H	H	H	H
115	H	H	H	H	H
116	H	H	B	B	B		1	LC		1
117	B	B	H	H	H		1	LC		1
118	H	H	H	H	H
119	B	B	B	B	B
120	B	B	B	B	B
121	H	B	H	H	H		2	L, LC	1	1
122	H	H	H	H	H
123	B	B	B	B	B
124	B	B	B	B	B
125	B	B	B	B	B
126	H	H	H	H	H
127	H	H	H	B	H		2	RC, R			1	1
128	H	H	H	H	B		1	R				1
129	H	H	H	H	H
130	H	H	H	H	H
131	B	B	B	B	B
132	H	H	H	H	B		1	R				1
133	H	H	H	H	H
134	H	H	H	H	H
135	H	H	H	H	H
136	H	H	H	H	H
137	H	H	H	H	H
138	B	B	B	H	H		1	RC			1
139	H	B	B	H	H		2	L, RC	1		1
140	B	B	B	B	B
141	H	H	H	H	H
142	H	H	H	H	H
143	B	H	H	B	B		2	L, RC	1		1
144	H	H	H	H	H
145	H	H	H	H	H
146	H	H	H	H	H
147	B	B	B	B	B
148	H	H	B	B	B		1	LC		1
149	H	H	H	H	H
150	H	B	B	B	H		2	L, R	1			1
151	B	B	B	B	H		1	R				1
152	H	H	H	H	H
153	H	H	H	H	H
154	B	B	B	B	B
155	B	B	H	H	H		1	LC		1
156	B	B	B	B	H		1	R				1
157	H	H	H	H	H
158	B	B	B	B	B
159	B	B	B	H	H		1	RC			1
160	B	B	B	B	B
161	H	H	H	H	H
162	B	B	B	H	H		1	RC			1
163	B	B	B	B	B
164	H	H	H	H	B		1	R				1
165	B	B	B	B	B
166	B	B	B	B	B
167	H	H	H	H	H
168	H	H	H	H	H
169	H	B	B	B	B		1	L	1
170	B	H	H	H	H		1	L	1
171	B	B	B	B	B
172	H	H	H	H	H
173	B	B	B	B	H		1	R				1
174	X	X	X	X	X	DISCARD
175	B	B	B	B	B
176	B	H	H	H	H		1	L	1
177	H	H	B	B	B		1	LC		1
178	B	B	B	B	H		1	R				1
179	B	H	H	H	B		2	L, R	1			1
180	H	H	H	H	H
181	B	H	B	B	B		2	L, LC	1	1
182	H	H	H	H	H
183	B	B	B	H	H		1	RC			1
184	B	H	H	H	H		1	L	1
185	H	H	H	H	H
186	B	B	B	B	H		1	R				1
187	H	H	B	B	B		1	LC		1
188	B	B	B	H	H		1	RC			1
189	H	H	H	H	H
190	H	B	B	B	B		1	L	1
191	H	H	H	H	H
192	B	B	H	H	H		1	LC		1
193	H	H	H	H	B		1	R				1
194	H	H	H	H	H
195	H	H	B	B	B		1	LC		1
196	H	B	B	B	B		1	L	1
197	H	H	H	H	H
198	H	H	H	H	H
199	B	B	B	B	B
200	H	B	B	B	B		1	L	1
201	B	B	H	H	H		1	LC		1
202	B	H	H	H	B		2	L, R	1			1
203	H	H	H	H	H
204	B	B	B	B	H		1	R				1
205	H	B	B	B	B		1	L	1
206	B	B	B	B	B
207	H	H	H	H	B		1	R				1
208	B	B	H	H	H		1	LC		1
209	B	B	B	B	B
210	B	B	B	B	H		1	R				1
211	H	H	H	H	H
212	B	B	B	B	H		1	R				1
213	H	H	H	H	H
214	B	B	H	H	H		1	LC		1
215	H	H	H	B	B		1	RC			1
216	H	B	B	B	B		1	L	1
217	B	B	B	B	B
218	H	H	H	B	B		1	RC			1
219	B	H	B	B	B		2	L, LC	1	1
220	B	B	B	B	H		1	R				1
221	H	H	H	B	B		1	RC			1
222	B	B	B	H	H		1	RC			1
223	H	H	H	B	B		1	RC			1
224	H	B	B	B	B		1	L	1
225	H	H	H	H	H
226	H	B	B	B	B		1	L	1
227	B	B	H	B	B		2	LC, RC		1	1
228	H	H	H	H	H
229	B	B	H	H	H		1	LC		1
230	H	H	H	B	B		1	RC			1
231	B	B	B	H	H		1	RC			1
232	B	B	B	B	B
233	H	B	B	B	B		1	L	1
234	H	H	H	B	B		1	RC			1
235	H	H	H	H	H
236	H	H	B	B	B		1	LC		1
237	H	B	B	B	H		2	L, R	1			1
238	B	B	B	B	B
239	B	B	B	B	B
240	H	H	H	H	H
241	B	H	H	H	H		1	L	1
242	B	B	B	B	B
243	H	H	H	H	H
244	H	H	B	B	H		2	LC, R		1		1
245	B	B	B	B	B
246	H	B	B	B	B		1	L	1
247	B	B	B	B	B
248	B	H	H	H	H		1	L	1
249	B	H	H	H	H		1	L	1
250	B	H	H	H	H		1	L	1
251	H	H	H	H	H
252	H	H	H	H	B		1	R				1
253	B	B	B	B	B
254	H	H	H	H	H
255	H	H	H	B	B		1	RC			1
256	H	H	H	H	H
257	B	B	H	H	H		1	LC		1
258	B	H	B	B	B		2	L, LC	1	1
259	H	H	H	H	H
260	H	H	H	B	B		1	RC			1
261	H	H	H	H	H
262	B	H	H	H	H		1	L	1
263	B	H	H	H	H		1	L	1
264	H	H	X	H	X	DISCARD
265	H	H	H	B	B		1	RC			1
266	B	B	B	B	B
267	H	H	H	B	B		1	RC			1
268	B	B	B	H	H		1	RC			1
269	B	B	B	B	B
270	B	B	H	H	H		1	LC		1
271	H	H	B	B	B		1	LC		1
272	H	H	H	B	B		1	RC			1
273	H	H	B	B	B		1	LC		1
274	B	B	B	B	H		1	R				1
275	H	B	B	B	B		1	L	1
276	B	B	B	B	B
277	B	B	B	B	B
278	H	H	H	H	H
279	B	B	B	B	B
280	B	B	B	B	B
281	H	B	B	B	B		1	L	1
282	H	H	H	H	H
283	B	B	B	B	H		1	R				1
284	H	H	B	B	B		1	LC		1
285	B	B	B	B	B
286	H	B	B	B	H		2	L, R	1			1
287	H	B	B	B	B		1	L	1
288	B	B	B	B	H		1	R				1
289	H	H	B	B	B		1	LC		1
290	B	B	B	H	H		1	RC			1
291	B	B	B	B	B
292	H	H	H	H	H
293	H	H	H	H	H
294	B	B	B	H	H		1	RC			1
295	B	B	B	B	H		1	R				1
296	H	H	H	H	B		1	R				1
297	B	B	B	B	B
298	B	B	B	B	B
299	B	B	B	H	H		1	RC			1
300	H	H	H	B	B		1	RC			1
301	H	H	H	H	B		1	R				1
302	B	H	H	H	H		1	L	1
303	H	B	B	B	B		1	L	1
304	H	B	B	B	B		1	L	1
305	H	B	B	B	B		1	L	1
306	H	B	B	B	B		1	L	1
307	B	B	B	B	B
308	B	B	H	H	H		1	LC		1
309	H	H	H	H	H
310	H	H	H	B	B		1	RC			1
311	B	B	B	B	B
312	H	H	H	H	H
313	B	B	B	B	H		1	R				1
314	B	B	B	B	B
315	H	H	B	B	B		1	LC		1
316	H	H	H	H	H
317	H	H	H	H	B		1	R				1
318	H	H	H	H	H
319	B	B	H	H	H		1	LC		1
320	H	H	H	B	B		1	RC			1
321	B	B	B	B	B
322	H	H	H	H	H
323	H	H	H	H	B		1	R				1
324	B	B	B	H	H		1	RC			1
325	H	H	H	H	H
326	H	H	H	B	B		1	RC			1
327	H	H	H	H	H
328	H	H	H	H	H
329	B	B	H	H	H		1	LC		1
330	B	B	B	B	B
331	H	H	B	B	B		1	LC		1
332	B	B	B	B	B
333	B	B	B	B	B
334	B	B	B	H	H		1	RC			1
335	B	B	B	B	B
336	H	B	B	B	B		1	L	1
337	H	B	B	B	H		2	L, R	1			1
338	H	H	H	H	H
339	B	B	B	B	B
340	B	B	B	B	B
341	H	H	H	H	H
342	H	H	H	B	B		1	RC			1
343	B	B	B	B	B
344	H	B	B	B	B		1	L	1
345	B	B	B	H	H		1	RC			1
346	B	B	H	H	H		1	LC		1
347	H	B	B	B	B		1	L	1
348	H	H	H	H	H
349	H	H	H	H	H
350	H	H	H	H	H
351	B	B	B	H	H		1	RC			1
352	H	H	B	B	B		1	LC		1
353	B	B	H	H	H		1	LC		1
354	B	B	B	B	H		1	R				1
355	H	H	H	B	B		1	RC			1
356	B	B	B	B	B
357	B	B	H	H	H		1	LC		1
358	B	B	H	H	H		1	LC		1
359	B	B	B	B	B
360	H	H	H	H	H
361	B	B	B	B	B
362	H	H	H	B	B		1	RC			1
363	B	B	B	B	B
364	H	H	H	H	H
365	H	H	H	B	B		1	RC			1
366	H	B	B	B	B		1	L	1
367	H	B	H	H	H		2	L, LC	1	1
368	B	B	B	B	B
n=							353										L	LC	RC	R	sum
total CO							219		63	47	50	59	219	brc-1 zim-1 (V)		% for domain	28.7671	21.4612	22.8311	26.9406	100
total TCO							0									cM for domain	17.847	13.3144	14.1643	16.7139	62.0397
total DCO							23
total SCO							173
total NCO							157
cM							62.0397
							SCO	L=	46
								LC=	38
								RC=	43
								R=	46

## Sheet: brc-1 zim-1 (I)
	brc-1 zim-1 (I)			male
WORM	A	B	C	D	E		#CO	domain	L	LC	RC	R
1	H	H	H	H	H
2	B	B	H	H	H		1	LC		1
3	H	H	H	H	B		1	R				1
4	B	B	B	H	H		1	RC			1
5	H	B	B	B	B		1	L	1
6	H	B	B	B	B		1	L	1
7	B	H	H	H	H		1	L	1
8	H	H	H	H	H
9	B	B	H	H	H		1	LC		1
10	B	B	H	H	H		1	LC		1
11	H	H	H	H	B		1	R				1
12	H	H	H	H	B		1	R				1
13	H	H	B	B	B		1	LC		1
14	H	H	H	H	H
15	B	B	B	B	B
16	B	B	B	B	H		1	R				1
17	H	H	H	H	B		1	R				1
18	B	B	B	H	H		1	RC			1
19	H	H	H	H	H
20	B	B	H	B	B		2	LC, RC		1	1
21	H	H	H	H	H
22	H	H	H	H	H
23	B	H	H	H	H		1	L	1
24	B	B	H	H	H		1	LC		1
25	X	H	X	X	B	DISCARD
26	B	B	H	B	B		2	LC, RC		1	1
27	H	H	H	H	B		1	R				1
28	H	B	B	B	B		1	L	1
29	H	H	H	H	B		1	R				1
30	H	H	H	H	H
31	B	B	B	B	B
32	B	H	B	B	B		2	L, LC	1	1
33	H	H	H	H	H
34	H	B	B	B	B		1	L	1
35	H	H	H	H	H
36	B	B	H	H	H		1	LC		1
37	H	H	H	B	B		1	RC			1
38	B	H	H	H	H		1	L	1
39	H	H	H	H	H
40	B	B	H	H	H		1	LC		1
41	B	B	B	B	B
42	B	B	B	B	B
43	H	H	H	H	H
44	B	B	B	B	B
45	B	B	B	B	B
46	H	H	B	B	B		1	LC		1
47	H	H	H	H	H
48	B	B	H	H	H		1	LC		1
49	H	H	H	H	H
50	B	B	H	H	H		1	LC		1
51	B	B	B	B	B
52	B	B	B	B	B
53	H	H	H	H	H
54	B	B	H	B	B		2	LC, RC		1	1
55	B	B	B	B	B
56	H	B	B	B	B		1	L	1
57	B	B	H	H	H		1	LC		1
58	H	H	H	H	H
59	B	B	B	B	B
60	H	H	H	H	B		1	R				1
61	B	B	B	B	B
62	H	H	B	B	H		2	LC, R		1		1
63	B	B	B	B	B
64	B	B	H	H	H		1	LC		1
65	H	H	B	H	H		2	LC, RC		1	1
66	B	H	H	H	H		1	L	1
67	B	B	B	B	B
68	B	B	B	B	B
69	H	H	H	H	H
70	X	X	H	X	H	DISCARD
71	H	H	H	B	B		1	RC			1
72	B	H	H	B	B		2	L, RC	1		1
73	B	H	H	B	B		2	L, RC	1		1
74	H	H	H	B	B		1	RC			1
75	B	B	B	B	B
76	H	H	B	B	B		1	LC		1
77	H	H	H	H	B		1	R				1
78	B	B	B	B	B
79	B	B	B	B	B
80	H	H	H	H	H
81	B	B	B	B	B
82	B	B	B	B	B
83	B	B	H	H	H		1	LC		1
84	H	H	H	H	H
85	B	B	B	H	B		2	RC, R			1	1
86	B	B	H	H	H		1	LC		1
87	H	B	B	H	H		2	L, RC	1		1
88	B	H	H	H	H		1	L	1
89	B	B	B	H	H		1	RC			1
90	B	B	B	B	B
91	H	H	H	H	H
92	B	H	H	B	B		2	L, RC	1		1
93	B	B	B	B	B
94	H	H	B	B	B		1	LC		1
95	H	H	H	H	H
96	H	H	B	B	B		1	LC		1
97	B	B	H	B	B		2	LC, RC		1	1
98	H	H	H	B	B		1	RC			1
99	X	X	X	X		DISCARD
100	B	B	B	B	B
101	B	B	H	H	H		1	LC		1
102	B	B	B	B	H		1	R				1
103	B	B	B	B	B
104	B	B	H	H	H		1	LC		1
105	H	B	B	B	B		1	L	1
106	B	B	B	B	B
107	X	X	X	X	X	DISCARD
108	H	H	H	B	B		1	RC			1
109	H	H	H	H	H
110	X	X	X	X	X	DISCARD
111	B	B	B	H	H		1	RC			1
112	B	H	H	H	H		1	L	1
113	H	H	H	B	H		2	RC, R			1	1
114	B	B	H	H	H		1	LC		1
115	H	H	H	H	H
116	B	B	B	B	B
117	H	H	B	B	B		1	LC		1
118	H	H	B	B	B		1	LC		1
119	B	B	H	H	B		2	LC, R		1		1
120	B	B	B	B	B
121	B	B	B	B	B
122	B	B	B	B	B
123	H	H	H	H	H
124	B	B	B	H	H		1	RC			1
125	H	H	H	H	H
126	H	H	H	B	B		1	RC			1
127	H	H	H	H	H
128	H	H	H	H	H
129	B	B	B	B	B
130	H	H	B	B	B		1	LC		1
131	H	B	B	B	B		1	L	1
132	B	B	H	H	H		1	LC		1
133	H	H	H	B	B		1	RC			1
134	H	H	B	B	B		1	LC		1
135	B	B	H	H	H		1	LC		1
136	B	H	H	H	H		1	L	1
137	B	B	H	H	H		1	LC		1
138	H	B	H	H	H		2	L, LC	1	1
139	H	H	H	H	H
140	H	H	H	H	H
141	B	B	B	B	B
142	H	B	B	B	H		2	L, R	1			1
143	B	B	B	B	B
144	B	B	H	H	H		1	LC		1
145	B	B	B	B	H		1	R				1
146	H	H	H	H	H
147	H	B	B	B	B		1	L	1
148	B	B	B	B	H		1	R				1
149	H	B	B	H	H		2	L, RC	1		1
150	H	B	B	B	B		1	L	1
151	B	H	B	B	B		2	L, LC	1	1
152	B	H	H	H	H		1	L	1
153	B	B	B	H	H		1	RC			1
154	B	B	B	B	B
155	B	B	H	H	H		1	LC		1
156	H	H	H	B	B		1	RC			1
157	B	B	B	B	H		1	R				1
158	B	B	B	B	B
159	B	B	B	B	B
160	B	B	H	H	H		1	LC		1
161	B	B	B	H	H		1	RC			1
162	H	B	B	B	B		1	L	1
163	H	H	H	H	H
164	B	B	H	B	B		2	LC, RC		1	1
165	H	H	H	H	H
166	H	H	H	B	B		1	RC			1
167	B	H	H	H	H		1	L	1
168	H	B	B	B	B		1	L	1
169	H	H	B	B	B		1	LC		1
170	H	H	B	B	B		1	LC		1
171	B	B	B	B	B
172	H	H	H	B	B		1	RC			1
173	H	H	B	H	H		2	LC, RC		1	1
174	H	B	B	B	B		1	L	1
175	H	H	H	B	H		2	RC, R			1	1
176	B	B	B	B	B
177	H	H	B	B	B		1	LC		1
178	B	B	B	B	B
179	H	H	B	B	B		1	LC		1
180	B	B	B	B	B
181	H	H	B	B	B		1	LC		1
182	H	H	H	H	H
183	H	B	H	B	B		3	L, LC, RC	1	1	1
184	B	B	B	B	B
185	B	B	B	B	B
186	H	H	H	B	B		1	RC			1
187	B	B	H	H	B		2	LC, R		1		1
188	H	H	H	H	H
189	H	H	H	B	B		1	RC			1
190	H	H	H	H	H
191	H	H	H	B	B		1	RC			1
192	H	B	B	B	B		1	L	1
193	H	H	H	H	H
194	H	H	H	H	B		1	R				1
195	B	B	B	B	H		1	R				1
196	H	H	H	H	H
197	H	H	H	B	B		1	RC			1
198	B	B	B	B	B
199	B	B	H	H	H		1	LC		1
200	H	H	B	B	B		1	LC		1
201	H	H	H	H	H
202	B	B	H	H	H		1	LC		1
203	B	B	B	B	B
204	B	B	H	B	B		2	LC, RC		1	1
205	B	B	B	H	H		1	RC			1
206	B	B	B	B	B
207	B	B	B	H	H		1	RC			1
208	B	B	B	B	B
209	B	B	B	B	H		1	R				1
210	B	B	H	H	H		1	LC		1
211	B	B	B	B	B
212	H	H	H	H	H
213	B	B	B	B	B
214	H	H	B	B	B		1	LC		1
215	H	H	H	H	B		1	R				1
216	B	B	B	B	B
217	B	B	B	B	B
218	H	B	B	B	B		1	L	1
219	H	H	H	H	B		1	R				1
220	B	H	H	H	H		1	L	1
221	H	H	H	B	B		1	RC			1
222	H	H	H	H	H
223	B	B	B	B	B
224	B	B	B	B	B
225	H	B	B	B	B		1	L	1
226	B	B	H	H	H		1	LC		1
227	H	H	H	H	H
228	B	H	H	H	H		1	L	1
229	B	B	H	H	H		1	LC		1
230	B	B	B	B	B
231	B	B	B	H	H		1	RC			1
232	H	H	B	B	B		1	LC		1
233	H	H	B	B	B		1	LC		1
234	B	B	B	B	H		1	R				1
235	B	B	H	B	H		3	LC, RC, R		1	1	1
236	B	B	B	H	H		1	RC			1
237	H	H	H	H	H
238	B	H	H	H	H		1	L	1
239	H	H	B	B	H		2	LC, R		1		1
240	B	H	H	H	B		2	L, R	1			1
241	H	B	B	H	H		2	L, RC	1		1
242	H	H	H	H	H
243	H	H	H	H	H
244	B	B	H	H	H		1	LC		1
245	B	B	B	H	H		1	RC			1
246	B	B	B	B	B
247	H	H	H	B	B		1	RC			1
248	B	B	B	B	B
249	H	H	H	B	B		1	RC			1
250	H	B	B	B	B		1	L	1
251	B	B	B	H	H		1	RC			1
252	B	B	B	B	B
253	H	H	B	B	B		1	LC		1
254	H	H	H	B	B		1	RC			1
255	B	H	H	H	H		1	L	1
256	H	H	H	H	B		1	R				1
257	H	H	B	B	B		1	LC		1
258	H	H	H	H	H
259	H	H	H	H	H
260	B	B	B	H	H		1	RC			1
261	B	H	H	B	B		2	L, RC	1		1
262	H	B	B	B	B		1	L	1
263	B	B	B	H	H		1	RC			1
264	B	H	H	X	H	DISCARD
265	B	B	H	H	H		1	LC		1
266	B	B	B	B	B
267	B	B	B	B	H		1	R				1
268	H	H	B	B	H		2	LC, R		1		1
269	B	B	B	B	B
270	B	B	B	B	B
271	H	H	H	H	H
272	H	H	H	H	H
273	B	B	B	B	B
274	H	H	H	H	H
275	B	B	B	B	B
276	H	H	H	H	H
277	B	B	B	B	B
278	B	B	B	B	B
279	H	H	H	H	B		1	R				1
280	H	H	H	H	H
281	B	B	H	B	B		2	LC, RC		1	1
282	B	B	H	H	H		1	LC		1
283	B	H	B	B	B		2	L, LC	1	1
284	B	B	B	H	H		1	RC			1
285	H	H	H	H	H
286	H	B	B	B	B		1	L	1
287	B	B	B	H	H		1	RC			1
288	H	H	B	B	B		1	LC		1
289	B	B	B	B	B
290	H	H	H	B	B		1	RC			1
291	H	H	H	H	H
292	H	H	H	B	B		1	RC			1
293	H	H	B	B	B		1	LC		1
294	B	B	B	B	B
295	B	B	B	H	H		1	RC			1
296	H	H	H	H	B		1	R				1
297	H	H	H	H	H
298	B	B	B	B	B
299	H	H	B	B	B		1	LC		1
300	H	H	H	H	H
301	H	H	H	H	H
302	H	H	H	H	B		1	R				1
303	B	B	B	B	H		1	R				1
304	H	H	H	H	H
305	B	B	B	H	H		1	RC			1
306	B	B	H	H	H		1	LC		1
307	B	B	B	B	B
308	H	B	B	B	H		2	L, R	1			1
309	H	B	B	B	B		1	L	1
310	B	B	B	H	H		1	RC			1
311	H	H	H	H	H
312	B	B	B	H	H		1	RC			1
313	H	B	B	H	H		2	L, RC	1		1
314	B	B	B	B	B
315	H	H	H	H	H
316	H	H	H	H	B		1	R				1
317	H	H	H	H	H
318	H	H	H	H	H
319	H	H	H	H	H
320	B	H	H	B	B		2	L, RC	1		1
321	H	H	H	H	H
322	H	H	H	B	B		1	RC			1
323	B	B	B	B	B
324	H	H	H	H	H
325	B	B	B	B	B
326	B	B	H	B	B		2	LC, RC		1	1
327	H	H	H	B	B		1	RC			1
328	H	H	B	B	B		1	LC		1
329	H	H	H	B	B		1	RC			1
330	B	B	B	B	B
331	H	H	B	B	B		1	LC		1
332	B	B	B	B	B
333	B	B	B	B	B
334	B	B	B	B	B
335	H	H	H	H	H
336	H	H	B	B	B		1	LC		1
337	H	H	H	H	H
338	H	H	B	B	H		2	LC, R		1		1
339	H	H	H	H	H
340	H	H	H	H	H
341	H	H	H	H	H
342	B	B	B	B	B
343	H	H	H	H	H
344	H	B	B	B	B		1	L	1
345	B	B	B	H	H		1	RC			1
346	H	H	H	H	H
347	H	H	H	B	B		1	RC			1
348	B	B	B	B	B
349	H	H	H	H	B		1	R				1
350	B	B	B	B	B
351	H	H	H	B	B		1	RC			1
352	B	B	B	B	B
353	B	H	H	B	B		2	L, RC	1		1
354	B	H	H	H	H		1	L	1
355	H	B	B	B	B		1	L	1
356	H	H	H	H	H
357	B	B	B	B	B
358	H	H	H	H	H
359	B	B	B	B	H		1	R				1
360	H	B	B	B	B		1	L	1
361	H	H	H	H	H
362	H	H	B	B	B		1	LC		1
363	B	B	B	H	H		1	RC			1
364	B	B	B	B	B
365	H	H	H	B	B		1	RC			1
366	B	B	B	B	B
367	H	B	B	B	H		2	L, R	1			1
368	H	H	H	H	H
n=							362										L	LC	RC	R	sum
total CO							250		55	79	74	42	250	brc-1 zim-1 (I)		% for domain	22	31.6	29.6	16.8	100
total TCO							2									cM for domain	15.1934	21.8232	20.442	11.6022	69.0608
total DCO							37
total SCO							170
total NCO							153
cM							69.0608
							SCO	L=	36
								LC=	57
								RC=	49
								R=	28

## Sheet: all
											% for each domain (V)				p-value (Fisher)					% for each domain (V)				P-value (Fisher)					% for each domain (V)									% for each domain (V)
										%	left	left CO	other CO	total CO	WT	brc-1	zim-1		%	left center	LC CO	other CO	total CO	WT	brc-1	zim-1		%	right center	RC CO	other CO	total CO	WT	brc-1	zim-1		%	right	right CO	other CO	total CO	WT	brc-1	zim-1
			% for each domain							41.1765	wild type	35	50	85					3.52941	wild type	3	82	85					16.4706	wild type	14	71	85					38.8235	wild type	33	52	85
			left	left center	right center	right	sum			41.9355	brc-1	39	54	93	1				12.9032	brc-1	12	81	93	0.0304				12.9032	brc-1	12	81	93	0.5305				32.2581	brc-1	30	63	93	0.433
	chromosome V	brc-1; zim-1 (n=219)	28.7671	21.4612	22.8311	26.9406	100			32.7273	zim-1	54	111	165	0.2104	0.1767			15.1515	zim-1	25	140	165	0.0053	0.713			20.6061	zim-1	34	131	165	0.4997	0.1308			31.5152	zim-1	52	113	165	0.2621	1
		zim-1 (n=165)	32.7273	15.1515	20.6061	31.5152	100			28.7671	brc-1; zim-1	63	156	219	0.0412	0.0255	0.4339		21.4612	brc-1; zim-1	47	172	219	0.0001	0.0838	0.146		22.8311	brc-1; zim-1	50	169	219	0.273	0.0452	0.6203		26.9406	brc-1; zim-1	59	160	219	0.0515	0.3413	0.3634
		brc-1 (n=93)	41.9355	12.9032	12.9032	32.2581	100
		wild type (n=85)	41.1765	3.52941	16.4706	38.8235	100
											% for each domain (I)									% for each domain (I)									% for each domain (I)									% for each domain (I)
	Chromosome I	brc-1 zim-1 (n=250)	22	31.6	29.6	16.8	100			%	left	left CO	other CO	total CO	WT	brc-1	zim-1		%	left center	LC CO	other CO	total CO	WT	brc-1	zim-1		%	right center	RC CO	other CO	total CO	WT	brc-1	zim-1		%	right	right CO	other CO	total CO	WT	brc-1	zim-1
		zim-1 (n=165)	34.5455	20.6061	24.2424	20.6061	100			33.7209	wild type	29	57	86					20.9302	wild type	18	68	86					13.9535	wild type	12	74	86					31.3953	wild type	27	59	86
		brc-1 (n=96)	26.0417	20.8333	30.2083	22.9167	100			26.0417	brc-1	25	71	96	0.3296				20.8333	brc-1	20	76	96	1				30.2083	brc-1	29	67	96	0.0123				22.9167	brc-1	22	74	96	0.2418
		wild type (n= 86)	33.7209	20.9302	13.9535	31.3953	100			34.5455	zim-1	57	108	165	1	0.1686			20.6061	zim-1	34	131	165	1	1			24.2424	zim-1	40	125	165	0.0707	0.3106			20.6061	zim-1	34	131	165	0.0643	0.7547
										22	brc-1; zim-1	55	195	250	0.0426	0.4767	0.0065		31.6	brc-1; zim-1	79	171	250	0.0726	0.0624	0.0177		29.6	brc-1; zim-1	74	176	250	0.004	0.8964	0.2616		16.8	brc-1; zim-1	42	208	250	0.0053	0.2163	0.3645
			cM for each domain								cM for each domain (V)					P-value (fisher)				cM for each domain (V)					P-value (fisher)				cM for each domain (V)					P-value (fisher)				cM for each domain (V)					P-value (fisher)
			left	left center	right center	right	sum			cM	left	left CO	other	total n	WT	brc-1	zim-1		cM	left center	LC CO	other	total n	WT	brc-1	zim-1		cM	right center	RC CO	other	total n	WT	brc-1	zim-1		cM	right	right CO	other	total n	WT	brc-1	zim-1
	chromosome V	brc-1; zim-1 (n=353)	17.847	13.3144	14.1643	16.7139	62.0397			18.617	wild type	35	153	188					1.59574	wild type	3	185	188					7.44681	wild type	14	174	188					17.5532	wild type	33	155	188
		zim-1 (n=270)	20	9.25926	12.5926	19.2593	61.1111			21.3115	brc-1	39	144	183	0.5196				6.55738	brc-1	12	171	183	0.0175				6.55738	brc-1	12	171	183	0.8397				16.3934	brc-1	30	153	183	0.7838
		brc-1 (n=183)	21.3115	6.55738	6.55738	16.3934	50.8197			20	zim-1	54	216	270	0.8104	0.8127			9.25926	zim-1	25	245	270	0.0005	0.3826			12.5926	zim-1	34	236	270	0.0885	0.0398			19.2593	zim-1	52	218	270	0.7144	0.4582
		wild type (n=188)	18.617	1.59574	7.44681	17.5532	45.2128			17.847	brc-1; zim-1	63	290	353	0.8158	0.3541	0.5349		13.3144	brc-1; zim-1	47	306	353	< 0.00001	0.0195	0.1299		14.1643	brc-1; zim-1	50	303	353	0.0248	0.0099	0.6363		16.7139	brc-1; zim-1	59	294	353	0.8109	1	0.4598
	Chromosome I	brc-1 zim-1 (n=362)	15.1934	21.8232	20.442	11.6022	69.0608				cM for each domain (I)									cM for each domain (I)									cM for each domain (I)									cM for each domain (I)
		zim-1 (n=268)	21.2687	12.6866	14.9254	12.6866	61.5672			cM	left	left CO	other	total n	WT	brc-1	zim-1		cM	left center	LC CO	other	total n	WT	brc-1	zim-1		cM	right center	RC CO	other	total n	WT	brc-1	zim-1		cM	right	right CO	other	total n	WT	brc-1	zim-1
		brc-1 (n=184)	13.587	10.8696	15.7609	11.9565	52.1739			15.4255	wild type	29	159	188					9.57447	wild type	18	170	188					6.38298	wild type	12	176	188					14.3617	wild type	27	161	188
		wild type (n= 188)	15.4255	9.57447	6.38298	14.3617	45.7447			13.587	brc-1	25	159	184	0.6603				10.8696	brc-1	20	164	184	0.7337				15.7609	brc-1	29	155	184	0.0046				11.9565	brc-1	22	162	184	0.5414
										21.2687	zim-1	57	211	268	0.1442	0.0464			12.6866	zim-1	34	234	268	0.3696	0.6583			14.9254	zim-1	40	228	268	0.0044	0.8942			12.6866	zim-1	34	234	268	0.6754	0.885
										15.1934	brc-1; zim-1	55	307	362	1	0.7013	0.0576		21.8232	brc-1; zim-1	79	283	362	0.0002	0.0015	0.0032		20.442	brc-1; zim-1	74	288	362	< 0.00001	0.2042	0.0937		11.6022	brc-1; zim-1	42	320	362	0.4155	0.889	0.7114
												chromosome V		P-value (Fisher)						chromosome V				P-value (Fisher)
												total CO	NCO	WT	brc-1	zim-1					total CO	"NCO"	total n	WT	brc-1	zim-1
											wild type	85	106							wild type	85	103	188
											brc-1	93	91	0.2564						brc-1	93	90	183	0.2996
											zim-1	165	124	0.0089	0.1849					zim-1	165	105	270	0.0008	0.0335
											brc-1; zim-1	219	157	0.0024	0.0864	0.8123				brc-1; zim-1	219	134	353	0.0002	0.0162	0.868
											Chromosome I			P-value (Fisher)						chromosome I				P-value (Fisher)
												total CO	NCO	WT	brc-1	zim-1					total CO	"NCO"	total n	WT	brc-1	zim-1
											wild type	86	107							wild type	86	102	188
											brc-1	96	90	0.1822						brc-1	96	88	184	0.2539
											zim-1	165	112	0.0014	0.1042					zim-1	165	103	268	0.0011	0.0527
											brc-1; zim-1	250	153	0.0001	0.0192	0.5231				brc-1; zim-1	250	112	362	< 0.00001	0.0002	0.0512
	genetic mapping data										% multiple COs
	Chr. I	SCO	DCO	TCO	NCO	total sample	cM			Chr I	wild type	0.0617284
	wild type	76	5	0	107	188	45.74				brc-1	0.0212766
	brc-1	92	2	0	90	184	52.17				zim-1	0.0576923
	zim-1	147	9	0	112	268	61.57				brc-1; zim-1	0.186603
	brc-1; zim-1	170	37	2	153	362	69.06			Chr V	wild type	0.0365854
											brc-1	0.0108696
	Chr. V										zim-1	0.123288
	wild type	79	3	0	106	188	45.21				brc-1; zim-1	0.117347
	brc-1	91	1	0	91	183	50.82
	zim-1	128	17	1	124	270	61.11
	brc-1; zim-1	173	23	0	157	353	62.04
			SCO				DCO						TCO
		Chr. I	L	LC	RC	R	L - LC	L - RC	L- R	LC - R	RC - R	LC -RC	L - LC - RC	L - LC -R	L - RC - R	LC - RC - R
		wild type	24	15	12	25	3	0	2	0	0	0	0	0	0	0
		brc-1	23	20	28	21	0	1	1	0	0	0	0	0	0	0
		zim-1	50	33	35	29	0	4	3	1	1	0	0	0	0	0
		brc-1; zim-1	36	57	49	28	4	10	4	6	3	10	1	0	0	1
		Chr. V
		wild type	33	3	13	30	0	0	2	0	1	0	0	0	0	0
		brc-1	38	12	12	29	0	0	1	0	0	0	0	0	0	0
		zim-1	40	20	28	40	1	4	9	2	0	1	0	0	0	1
		brc-1; zim-1	46	38	43	46	6	3	8	2	3	1	0	0	0	0

## Sheet: interference
															chi square
									interference table
	WT ( V)	L	LC	RC	R	sum			WT (V)	exp DCO freq	obs DCO freq	c.o.c	interference		WT (V)	expected DCO #	observed DCO		against brc-1	against zim-1	against brc-1; zim-1
n=	# CO	35	3	14	33	85			L - LC	0.0029708	0	0	1		L - LC	0.558511	0		/	/	/
188	Co freq	0.18617	0.0159574	0.0744681	0.175532	0.452128			L - RC	0.0138637	0	0	1		L - RC	2.60638	0		/	/	/
									L- R	0.0326788	0.0106383	0.325541	0.674459		L- R	6.14362	2		0.604773	0.604773	0.400659
		exp DCO freq	obs # DCO	obs DCO freq	coc	interference			LC - R	0.00280104	0	0	1		LC - R	0.526596	0		/	/	/
	L - LC	0.0029708	0	0	0	1			RC - R	0.0130715	0.00531915	0.406926	0.593074		RC - R	2.45745	1		/	0.424954	0.836813
	L - RC	0.0138637	0	0	0	1			LC- RC	0.00118832	0	0	1		LC- RC	0.223404	0		/	/	/
	L - R	0.0326788	2	0.0106383	0.325541	0.674459
	LC - R	0.00280104	0	0	0	1			WT (I)	exp DCO freq	obs DCO freq	coc	interference		WT (I)	expected DCO #	observed DCO		against brc-1	against zim-1	against brc-1; zim-1
	RC - R	0.0130715	1	0.00531915	0.406926	0.593074			L - LC	0.0147691	0.0159574	1.08046	-0.0804598		L - LC	2.7766	3		/	/	/
	LC - RC	0.00118832	0	0	0	1			L - RC	0.00984608	0	0	1		L - RC	1.85106	0		/	/	/
									L - R	0.0221537	0.0106383	0.480204	0.519796		L- R	4.16489	2		0.77816	0.889243	0.789726
									LC - R	0.0137506	0	0	1		LC - R	2.58511	0		/	/	/
	WT (I)	L	LC	RC	R	sum			RC - R	0.00916704	0	0	1		RC - R	1.7234	0		/	/	/
n=	# CO	29	18	12	27	86			LC - RC	0.00611136	0	0	1		LC- RC	1.14894	0		/	/	/
188	Co freq	0.154255	0.0957447	0.0638298	0.143617	0.457447
									brc-1 (V)	exp DCO freq	obs DCO freq	coc	interference		brc-1 (V)	expected DCO #	observed DCO		against zim-1	against brc-1; zim-1
		exp DCO freq	obs # DCO	obs DCO freq	coc	interference			L - LC	0.0139747	0	0	1		L - LC	2.55738	0		/	/
	L - LC	0.0147691	3	0.0159574	1.08046	-0.0804598			L - RC	0.0139747	0	0	1		L - RC	2.55738	0		/	/
	L - RC	0.00984608	0	0	0	1			L - R	0.0349368	0.00546448	0.15641	0.84359		L- R	6.39344	1		0.124051	0.18598
	L - R	0.0221537	2	0.0106383	0.480204	0.519796			LC - R	0.0107498	0	0	1		LC - R	1.96721	0		/	/
	LC - R	0.0137506	0	0	0	1			RC - R	0.0107498	0	0	1		RC - R	1.96721	0		/	/
	RC - R	0.00916704	0	0	0	1			LC - RC	0.00429992	0	0	1		LC- RC	0.786885	0		/	/
	LC - RC	0.00611136	0	0	0	1
									brc-1 (I)	exp DCO freq	obs DCO freq	coc	interference		brc-1 (I)	expected DCO #	observed DCO		against zim-1	against brc-1; zim-1
									L - LC	0.0147684	0	0	1		L - LC	2.71739	0		/	/
	brc-1 ( V )	L	LC	RC	R	sum			L - RC	0.0214142	0.00543478	0.253793	0.746207		L - RC	3.94022	1		0.647743	0.222994
n=	# CO	39	12	12	30	93			L - R	0.0162453	0.00543478	0.334545	0.665455		L- R	2.98913	1		0.851596	0.596701
183	Co freq	0.213115	0.0655738	0.0655738	0.163934	0.508197			LC - R	0.0129962	0	0	1		LC - R	2.3913	0		/	/
									RC - R	0.0188445	0	0	1		RC - R	3.46739	0		/	/
		exp DCO freq	obs # DCO	obs DCO freq	coc	interference			LC - RC	0.0171314	0	0	1		LC- RC	3.15217	0		/	/
	L - LC	0.0139747	0	0	0	1
	L - RC	0.0139747	0	0	0	1			zim-1 (V)	exp DCO freq	obs DCO freq	coc	interference		zim-1 (V)	expected DCO #	observed DCO		against brc-1; zim-1
	L - R	0.0349368	1	0.00546448	0.15641	0.84359			L - LC	0.0185185	0.0037037	0.2	0.8		L - LC	5	1		0.260452
	LC - R	0.0107498	0	0	0	1			L - RC	0.0251852	0.0148148	0.588235	0.411765		L - RC	6.8	4		0.55409
	RC - R	0.0107498	0	0	0	1			L - R	0.0385185	0.0333333	0.865385	0.134615		L- R	10.4	9		0.744231
	LC - RC	0.00429992	0	0	0	1			LC - R	0.0178326	0.0111111	0.623077	0.376923		LC - R	4.81481	3		0.410117
									RC - R	0.0242524	0.0037037	0.152715	0.847285		RC - R	6.54815	1		0.435488
									LC - RC	0.0116598	0.00740741	0.635294	0.364706		LC- RC	3.14815	2		0.252244
	brc-1 (I)	L	LC	RC	R	sum
n=	# CO	25	20	29	22	96			zim-1 (I)	exp DCO freq	obs DCO freq	coc	interference		zim-1 (I)	expected DCO #	observed DCO		against brc-1; zim-1
184	Co freq	0.13587	0.108696	0.157609	0.119565	0.521739			L - LC	0.0269826	0	0	1		L - LC	7.23134	0		/
									L - RC	0.0317443	0.0149254	0.470175	0.529825		L - RC	8.50746	4		0.266636
		exp DCO freq	obs # DCO	obs DCO freq	coc	interference			L - R	0.0269826	0.011194	0.414861	0.585139		L- R	7.23134	3		0.639207
	L - LC	0.0147684	0	0	0	1			LC - R	0.0160949	0.00373134	0.231834	0.768166		LC - R	4.31343	1		0.339802
	L - RC	0.0214142	1	0.00543478	0.253793	0.746207			RC - R	0.0189352	0.00373134	0.197059	0.802941		RC - R	5.07463	1		0.516407
	L - R	0.0162453	1	0.00543478	0.334545	0.665455			LC - RC	0.0189352	0	0	1		LC- RC	5.07463	0		/
	LC - R	0.0129962	0	0	0	1
	RC - R	0.0188445	0	0	0	1			brc-1; zim-1 (V)	exp DCO freq	obs DCO freq	coc	interference		brc-1; zim-1 (V)	expected DCO #	observed DCO
	LC - RC	0.0171314	0	0	0	1			L - LC	0.0237623	0.0169972	0.715299	0.284701		L - LC	8.3881	6
									L - RC	0.0252791	0.00849858	0.33619	0.66381		L - RC	8.92351	3
									L - R	0.0298293	0.0226629	0.759752	0.240248		L- R	10.5297	8
	zim-1 ( V )	L	LC	RC	R	sum			LC - R	0.0222536	0.00566572	0.254598	0.745402		LC - R	7.85552	2
n=	# CO	54	25	34	52	165			RC - R	0.0236741	0.00849858	0.358983	0.641017		RC - R	8.35694	3
270	Co freq	0.2	0.0925926	0.125926	0.192593	0.611111			LC - RC	0.018859	0.00283286	0.150213	0.849787		LC- RC	6.65722	1
		exp DCO freq	obs # DCO	obs DCO freq	coc	interference			brc-1; zim-1 (I)	exp DCO freq	obs DCO freq	coc	interference		brc-1; zim-1 (I)	expected DCO #	observed DCO
	L - LC	0.0185185	1	0.0037037	0.2	0.8			L - LC	0.0331568	0.0138122	0.416571	0.583429		L - LC	12.0028	5
	L - RC	0.0251852	4	0.0148148	0.588235	0.411765			L - RC	0.0310583	0.0303867	0.978378	0.0216216		L - RC	11.2431	11
	L - R	0.0385185	9	0.0333333	0.865385	0.134615			L - R	0.0176277	0.0110497	0.62684	0.37316		L- R	6.38122	4
	LC - R	0.0178326	3	0.0111111	0.623077	0.376923			LC - R	0.0253197	0.019337	0.763713	0.236287		LC - R	9.16575	7
	RC - R	0.0242524	1	0.0037037	0.152715	0.847285			RC - R	0.0237172	0.0110497	0.465894	0.534106		RC - R	8.58564	4
	LC - RC	0.0116598	2	0.00740741	0.635294	0.364706			LC - RC	0.044611	0.0331492	0.743072	0.256928		LC- RC	16.1492	12
	zim-1 (I)	L	LC	RC	R	sum
n=	# CO	57	34	40	34	165
268	Co freq	0.212687	0.126866	0.149254	0.126866	0.615672
		exp DCO freq	obs # DCO	obs DCO freq	coc	interference
	L - LC	0.0269826	0	0	0	1
	L - RC	0.0317443	4	0.0149254	0.470175	0.529825
	L - R	0.0269826	3	0.011194	0.414861	0.585139
	LC - R	0.0160949	1	0.00373134	0.231834	0.768166
	RC - R	0.0189352	1	0.00373134	0.197059	0.802941
	LC - RC	0.0189352	0	0	0	1
	brc-1;zim-1 (V)	L	LC	RC	R	sum
n=	# CO	63	47	50	59	219
353	Co freq	0.17847	0.133144	0.141643	0.167139	0.620397
		exp DCO freq	obs # DCO	obs DCO freq	coc	interference
	L - LC	0.0237623	6	0.0169972	0.715299	0.284701
	L - RC	0.0252791	3	0.00849858	0.33619	0.66381
	L - R	0.0298293	8	0.0226629	0.759752	0.240248
	LC - R	0.0222536	2	0.00566572	0.254598	0.745402
	RC - R	0.0236741	3	0.00849858	0.358983	0.641017
	LC - RC	0.018859	1	0.00283286	0.150213	0.849787
	brc-1; zim-1 (I)	L	LC	RC	R	sum
n=	# CO	55	79	74	42	250
362	Co freq	0.151934	0.218232	0.20442	0.116022	0.690608
		exp DCO freq	obs # DCO	obs DCO freq	coc	interference
	L - LC	0.0331568	5	0.0138122	0.416571	0.583429
	L - RC	0.0310583	11	0.0303867	0.978378	0.0216216
	L - R	0.0176277	4	0.0110497	0.62684	0.37316
	LC - R	0.0253197	7	0.019337	0.763713	0.236287
	RC - R	0.0237172	4	0.0110497	0.465894	0.534106
	LC - RC	0.044611	12	0.0331492	0.743072	0.256928
			43
